# Supplementary material for: Hypoxia-Associated Prognostic Markers and Competing Endogenous RNA Co-Expression Networks in Breast Cancer
Source: Front Oncol. 2020 Dec 2;10:579868. doi: 10.3389/fonc.2020.579868 (PMC7738636; doi:10.3389/fonc.2020.579868)
Supplement: Supplementary Table 1 — Cellular pathways of 13 hypoxia related gene signature. [file Table_1.xls]

	Cellular pathways of 13 hypoxia related gene signature.
Gene symbol	Names	Pathway (source)
VEGFA	Vascular endothelial growth factor A	VEGF signaling pathway (hsa04370)
SLC2A1	Solute carrier family 2, facilitated glucose transporter member 1	HIF-1 signaling pathway (hsa04066)
PGAM1	Phosphoglycerate mutase 1	Glycolysis / Gluconeogenesis (hsa00010)
LDHA	Lactate dehydrogenase A	Glycolysis / Gluconeogenesis (hsa00010)
TPI1	Triosephosphate isomerase 1	Glycolysis / Gluconeogenesis (hsa00011)
P4HA1	Prolyl 4-hydroxylase subunit alpha-1	procollagen-proline 4-dioxygenase activity (GO:0004656)
MRPS17	Mitochondrial ribosomal protein S17	structural constituent of ribosome (GO:0003735)
CDKN3	Cyclin-dependent kinase inhibitor 3	G1/S transition of mitotic cell cycle (GO:0000082)
ADM	Adrenomedullin	adenylate cyclase-activating G protein-coupled receptor signaling pathway (GO:0007189)
NDRG1	N-Myc Downstream Regulated 1	Response to metal ion (GO:0010038)
TUBB6	Tubulin beta-6 chain	Gap junction (hsa04540)
ALDOA	Fructose-bisphosphate aldolase A	Glycolysis / Gluconeogenesis (hsa00011)
MIF	Macrophage migration inhibitory factor	Phenylalanine metabolism (hsa00360)
