# Supplementary material for: Hypoxia-Associated Prognostic Markers and Competing Endogenous RNA Co-Expression Networks in Breast Cancer
Source: Front Oncol. 2020 Dec 2;10:579868. doi: 10.3389/fonc.2020.579868 (PMC7738636; doi:10.3389/fonc.2020.579868)
Supplement: Supplementary Table 4 — Target mRNAs of hsa-miR-210-3p and hsa-miR-190b. [file Table_4.xlsx]

## Sheet: hsa-miR-190b
Generated at: 2020/04/11 13:23:41
mirDIP version: 4.1.11.1.
Database version: 4.1.0.3
Gene Symbol -
Micro RNA - hsa-miR-190b
Minimum Score - Very High
Results (457)
Gene Symbol	Uniprot	Pseudogene	MicroRNA	Integrated Score	Number of Sources	Score Class	Sources
NLGN1	Q8N2Q7		hsa-miR-190b	0.800931	19	Very High	BCmicrO|CoMeTa|Cupid|DIANA|ElMMo3|MBStar|microrna.org|MirAncesTar|miRDB|MirMAP|MirTar|Mirza-G|MultiMiTar|PACCMIT|RepTar|RNAhybrid|TargetRank|TargetScan|TargetSpy
BACH2	Q9BYV9		hsa-miR-190b	0.798577	19	Very High	BCmicrO|CoMeTa|Cupid|DIANA|ElMMo3|MBStar|microrna.org|MirAncesTar|miRDB|MirMAP|MirTar|Mirza-G|MultiMiTar|PACCMIT|RepTar|RNAhybrid|TargetRank|TargetScan|TargetSpy
OTUD4	Q01804		hsa-miR-190b	0.788881	20	Very High	BCmicrO|BiTargeting|CoMeTa|Cupid|DIANA|ElMMo3|MBStar|microrna.org|MirAncesTar|miRDB|MirMAP|MirTar|Mirza-G|MultiMiTar|PACCMIT|RepTar|RNAhybrid|TargetRank|TargetScan|TargetSpy
NEUROD1	Q13562		hsa-miR-190b	0.787203	17	Very High	BCmicrO|CoMeTa|Cupid|DIANA|ElMMo3|MBStar|microrna.org|mirbase|miRDB|MirMAP|MirTar|Mirza-G|MultiMiTar|PACCMIT|RepTar|TargetScan|TargetSpy
STK38L	Q9Y2H1		hsa-miR-190b	0.78087	19	Very High	BCmicrO|CoMeTa|Cupid|DIANA|ElMMo3|MBStar|microrna.org|MirAncesTar|mirbase|miRDB|MirMAP|MirTar|Mirza-G|MultiMiTar|RepTar|RNAhybrid|TargetRank|TargetScan|TargetSpy
DMD	P11532		hsa-miR-190b	0.779279	18	Very High	BCmicrO|CoMeTa|Cupid|DIANA|ElMMo3|MBStar|microrna.org|MirAncesTar|miRDB|MirMAP|MirTar|Mirza-G|MultiMiTar|PACCMIT|RepTar|RNAhybrid|TargetRank|TargetScan
PHLPP1	O60346		hsa-miR-190b	0.770236	16	Very High	BCmicrO|CoMeTa|Cupid|DIANA|ElMMo3|microrna.org|MirAncesTar|miRDB|MirMAP|MirTar|Mirza-G|PACCMIT|RepTar|TargetRank|TargetScan|TargetSpy
ERG	P11308		hsa-miR-190b	0.763489	18	Very High	BCmicrO|CoMeTa|Cupid|DIANA|ElMMo3|MBStar|microrna.org|MirAncesTar|mirbase|miRDB|MirMAP|MirTar|Mirza-G|RepTar|RNAhybrid|TargetRank|TargetScan|TargetSpy
CHD7	Q9P2D1		hsa-miR-190b	0.762981	18	Very High	BCmicrO|CoMeTa|Cupid|DIANA|ElMMo3|MBStar|microrna.org|MirAncesTar|mirbase|miRDB|MirMAP|MirTar|Mirza-G|PACCMIT|RepTar|RNAhybrid|TargetRank|TargetScan
ROCK1	Q13464		hsa-miR-190b	0.76148	18	Very High	BCmicrO|CoMeTa|Cupid|DIANA|ElMMo3|MBStar|microrna.org|MirAncesTar|miRDB|MirMAP|MirTar|Mirza-G|PACCMIT|RepTar|RNAhybrid|TargetRank|TargetScan|TargetSpy
FNDC3A	Q9Y2H6		hsa-miR-190b	0.757591	18	Very High	BCmicrO|CoMeTa|Cupid|DIANA|ElMMo3|MBStar|microrna.org|MirAncesTar|mirbase|miRDB|MirMAP|MirTar|Mirza-G|MultiMiTar|RepTar|RNAhybrid|TargetRank|TargetScan
HECA	Q9UBI9		hsa-miR-190b	0.757068	16	Very High	BCmicrO|CoMeTa|Cupid|DIANA|ElMMo3|MBStar|microrna.org|MirAncesTar|miRDB|MirMAP|MirTar|Mirza-G|MultiMiTar|RepTar|TargetRank|TargetScan
NBEA	Q8NFP9		hsa-miR-190b	0.751998	17	Very High	BCmicrO|CoMeTa|Cupid|DIANA|ElMMo3|MBStar|microrna.org|MirAncesTar|miRDB|MirMAP|MirSNP|MirTar|Mirza-G|RepTar|RNAhybrid|TargetRank|TargetScan
TCF4	P15884		hsa-miR-190b	0.747939	19	Very High	BCmicrO|CoMeTa|Cupid|DIANA|ElMMo3|MBStar|microrna.org|MirAncesTar|miRDB|MirMAP|MirTar|Mirza-G|MultiMiTar|PACCMIT|RepTar|RNAhybrid|TargetRank|TargetScan|TargetSpy
NAV3	Q8IVL0		hsa-miR-190b	0.746948	18	Very High	BCmicrO|CoMeTa|Cupid|DIANA|ElMMo3|MBStar|microrna.org|MirAncesTar|miRDB|MirMAP|MirTar|Mirza-G|PACCMIT|RepTar|RNAhybrid|TargetRank|TargetScan|TargetSpy
TNRC6A	Q8NDV7		hsa-miR-190b	0.746592	16	Very High	BCmicrO|Cupid|DIANA|ElMMo3|MBStar|microrna.org|MirAncesTar|mirbase|miRDB|MirMAP|MirTar|Mirza-G|RepTar|RNAhybrid|TargetRank|TargetScan
SAMD4A	Q9UPU9		hsa-miR-190b	0.740867	18	Very High	BCmicrO|CoMeTa|Cupid|DIANA|ElMMo3|MBStar|microrna.org|MirAncesTar|mirbase|miRDB|MirMAP|MirSNP|MirTar|Mirza-G|RepTar|RNAhybrid|TargetRank|TargetScan
PAX6	P26367		hsa-miR-190b	0.732839	19	Very High	BCmicrO|CoMeTa|Cupid|DIANA|ElMMo3|MBStar|microrna.org|MirAncesTar|miRDB|MirMAP|MirSNP|MirTar|Mirza-G|PACCMIT|RepTar|RNAhybrid|TargetRank|TargetScan|TargetSpy
ACTR3	P61158		hsa-miR-190b	0.728099	17	Very High	BCmicrO|CoMeTa|Cupid|DIANA|ElMMo3|MBStar|microrna.org|MirAncesTar|mirbase|miRDB|MirMAP|MirTar|Mirza-G|RepTar|RNAhybrid|TargetRank|TargetScan
STC1	P52823		hsa-miR-190b	0.727289	17	Very High	BCmicrO|CoMeTa|Cupid|DIANA|ElMMo3|MBStar|microrna.org|MirAncesTar|miRDB|MirMAP|Mirza-G|MultiMiTar|RepTar|RNAhybrid|TargetRank|TargetScan|TargetSpy
TMEM161B	Q8NDZ6		hsa-miR-190b	0.718335	16	Very High	BCmicrO|Cupid|DIANA|ElMMo3|MBStar|microrna.org|MirAncesTar|miRDB|MirMAP|MirTar|Mirza-G|RepTar|RNAhybrid|TargetRank|TargetScan|TargetSpy
SYNJ1	O43426		hsa-miR-190b	0.717636	16	Very High	BCmicrO|CoMeTa|DIANA|ElMMo3|MBStar|microrna.org|MirAncesTar|miRDB|MirMAP|MirTar|Mirza-G|PACCMIT|RepTar|TargetRank|TargetScan|TargetSpy
MYO5A	Q9Y4I1		hsa-miR-190b	0.716754	20	Very High	BCmicrO|BiTargeting|CoMeTa|DIANA|ElMMo3|MBStar|MirAncesTar|mirbase|miRDB|MirMAP|MirSNP|MirTar|Mirza-G|MultiMiTar|PACCMIT|RepTar|RNAhybrid|TargetRank|TargetScan|TargetSpy
C15orf41	Q9Y2V0		hsa-miR-190b	0.715637	18	Very High	BCmicrO|BiTargeting|Cupid|DIANA|ElMMo3|MBStar|microrna.org|MirAncesTar|miRDB|MirMAP|MirSNP|MirTar|Mirza-G|PACCMIT|RepTar|RNAhybrid|TargetRank|TargetScan
YTHDF3	Q7Z739		hsa-miR-190b	0.715523	15	Very High	BCmicrO|CoMeTa|Cupid|ElMMo3|MBStar|microrna.org|MirAncesTar|miRDB|MirTar|Mirza-G|RepTar|RNAhybrid|TargetRank|TargetScan|TargetSpy
DAG1	Q14118		hsa-miR-190b	0.709756	17	Very High	BCmicrO|CoMeTa|Cupid|DIANA|ElMMo3|MBStar|microrna.org|MirAncesTar|miRDB|MirMAP|MirSNP|MirTar|PACCMIT|RepTar|RNAhybrid|TargetRank|TargetScan
SMC6	Q96SB8		hsa-miR-190b	0.706615	19	Very High	BCmicrO|CoMeTa|DIANA|ElMMo3|MBStar|microrna.org|MirAncesTar|miRDB|MirMAP|MirSNP|MirTar|Mirza-G|MultiMiTar|PACCMIT|RepTar|RNAhybrid|TargetRank|TargetScan|TargetSpy
TP53INP1	Q96A56		hsa-miR-190b	0.704636	16	Very High	BCmicrO|Cupid|DIANA|ElMMo3|MBStar|microrna.org|MirAncesTar|miRDB|MirMAP|MirTar|Mirza-G|MultiMiTar|RepTar|TargetRank|TargetScan|TargetSpy
KCNQ5	Q9NR82		hsa-miR-190b	0.70222	16	Very High	BCmicrO|Cupid|DIANA|ElMMo3|MBStar|microrna.org|MirAncesTar|mirbase|miRDB|MirMAP|MirSNP|PACCMIT|RNAhybrid|TargetRank|TargetScan|TargetSpy
RPS6KA3	P51812		hsa-miR-190b	0.701969	17	Very High	BCmicrO|CoMeTa|DIANA|ElMMo3|MBStar|microrna.org|MirAncesTar|miRDB|MirMAP|MirTar|Mirza-G|MultiMiTar|PACCMIT|RepTar|TargetRank|TargetScan|TargetSpy
BCL11A	Q9H165		hsa-miR-190b	0.700184	17	Very High	BCmicrO|CoMeTa|Cupid|DIANA|ElMMo3|MBStar|microrna.org|MirAncesTar|miRDB|MirMAP|MirTar|Mirza-G|MultiMiTar|RepTar|RNAhybrid|TargetRank|TargetSpy
HCN1	O60741		hsa-miR-190b	0.698928	16	Very High	BCmicrO|Cupid|DIANA|ElMMo3|MBStar|microrna.org|MirAncesTar|miRDB|MirMAP|Mirza-G|MultiMiTar|PACCMIT|RepTar|TargetRank|TargetScan|TargetSpy
BNIP3L	O60238		hsa-miR-190b	0.694838	15	Very High	BCmicrO|CoMeTa|Cupid|DIANA|ElMMo3|MBStar|microrna.org|MirAncesTar|miRDB|MirMAP|Mirza-G|RepTar|RNAhybrid|TargetRank|TargetScan
HAS2	Q92819		hsa-miR-190b	0.691177	17	Very High	BCmicrO|CoMeTa|Cupid|DIANA|ElMMo3|MBStar|microrna.org|MirAncesTar|mirbase|miRDB|MirMAP|Mirza-G|PACCMIT|RepTar|RNAhybrid|TargetRank|TargetScan
EBF3	Q9H4W6		hsa-miR-190b	0.689933	15	Very High	BCmicrO|Cupid|DIANA|ElMMo3|MBStar|microrna.org|MirAncesTar|miRDB|MirMAP|Mirza-G|RepTar|RNAhybrid|TargetRank|TargetScan|TargetSpy
MEF2C	Q06413		hsa-miR-190b	0.68947	18	Very High	BCmicrO|BiTargeting|CoMeTa|Cupid|DIANA|ElMMo3|MBStar|microrna.org|MirAncesTar|miRDB|MirMAP|MirTar|Mirza-G|MultiMiTar|RepTar|RNAhybrid|TargetRank|TargetScan
TAOK3	Q9H2K8		hsa-miR-190b	0.687295	16	Very High	BCmicrO|CoMeTa|Cupid|DIANA|ElMMo3|microrna.org|MirAncesTar|mirbase|miRDB|MirMAP|Mirza-G|RepTar|RNAhybrid|TargetRank|TargetScan|TargetSpy
ZIC3	O60481		hsa-miR-190b	0.686434	16	Very High	BCmicrO|CoMeTa|Cupid|DIANA|ElMMo3|MBStar|microrna.org|MirAncesTar|miRDB|MirMAP|MirTar|Mirza-G|RNAhybrid|TargetRank|TargetScan|TargetSpy
OSBPL6	Q9BZF3		hsa-miR-190b	0.685217	16	Very High	BCmicrO|DIANA|ElMMo3|MBStar|microrna.org|MirAncesTar|mirbase|miRDB|MirMAP|MirSNP|MirTar|Mirza-G|RepTar|RNAhybrid|TargetRank|TargetScan
KCNA4	P22459		hsa-miR-190b	0.685095	15	Very High	BCmicrO|CoMeTa|DIANA|ElMMo3|microrna.org|mirbase|miRDB|MirMAP|MirTar|Mirza-G|RepTar|RNAhybrid|TargetRank|TargetScan|TargetSpy
PTPRS	Q13332		hsa-miR-190b	0.684141	16	Very High	BCmicrO|CoMeTa|Cupid|DIANA|ElMMo3|MBStar|microrna.org|MirAncesTar|MirMAP|MirSNP|Mirza-G|PACCMIT|RepTar|RNAhybrid|TargetScan|TargetSpy
ARPC5	O15511		hsa-miR-190b	0.683698	18	Very High	BCmicrO|CoMeTa|Cupid|DIANA|ElMMo3|MBStar|microrna.org|MirAncesTar|miRDB|MirMAP|MirSNP|MirTar|Mirza-G|PACCMIT|RNA22|RNAhybrid|TargetRank|TargetSpy
CELF4	Q9BZC1		hsa-miR-190b	0.680778	15	Very High	BCmicrO|Cupid|DIANA|ElMMo3|MBStar|microrna.org|MirAncesTar|miRDB|MirMAP|MirTar|Mirza-G|PACCMIT|RNAhybrid|TargetRank|TargetScan
TNRC6B	Q9UPQ9		hsa-miR-190b	0.67991	17	Very High	BCmicrO|BiTargeting|CoMeTa|Cupid|DIANA|ElMMo3|MBStar|MirAncesTar|miRDB|MirMAP|MirTar|Mirza-G|PACCMIT|RepTar|RNAhybrid|TargetScan|TargetSpy
WDFY3	Q8IZQ1		hsa-miR-190b	0.679648	16	Very High	BCmicrO|CoMeTa|Cupid|DIANA|ElMMo3|MBStar|microrna.org|MirAncesTar|miRDB|MirMAP|MirTar|Mirza-G|PACCMIT|RepTar|TargetScan|TargetSpy
HGF	P14210		hsa-miR-190b	0.671464	15	Very High	BCmicrO|CoMeTa|Cupid|DIANA|ElMMo3|microrna.org|MirAncesTar|miRDB|MirMAP|Mirza-G|PACCMIT|RepTar|RNAhybrid|TargetScan|TargetSpy
MEF2A	Q02078		hsa-miR-190b	0.669933	16	Very High	BCmicrO|CoMeTa|Cupid|DIANA|ElMMo3|MBStar|microrna.org|MirAncesTar|MirMAP|Mirza-G|MultiMiTar|PACCMIT|RepTar|RNAhybrid|TargetRank|TargetScan
TRPS1	Q9UHF7		hsa-miR-190b	0.667354	18	Very High	BCmicrO|CoMeTa|DIANA|ElMMo3|MBStar|microrna.org|MirAncesTar|miRDB|MirMAP|MirTar|Mirza-G|MultiMiTar|PACCMIT|RepTar|RNAhybrid|TargetRank|TargetScan|TargetSpy
PHF20L1	A8MW92		hsa-miR-190b	0.665522	17	Very High	BCmicrO|CoMeTa|Cupid|DIANA|ElMMo3|MBStar|microrna.org|MirAncesTar|MirMAP|MirTar|Mirza-G|MultiMiTar|PACCMIT|RepTar|RNAhybrid|TargetRank|TargetSpy
KLF15	Q9UIH9		hsa-miR-190b	0.664654	16	Very High	BCmicrO|CoMeTa|DIANA|ElMMo3|MBStar|microrna.org|MirAncesTar|miRDB|MirMAP|MirTar|Mirza-G|RepTar|RNAhybrid|TargetRank|TargetScan|TargetSpy
SHANK2	Q9UPX8		hsa-miR-190b	0.66156	17	Very High	BCmicrO|CoMeTa|Cupid|DIANA|ElMMo3|MBStar|microrna.org|MirAncesTar|miRDB|MirMAP|Mirza-G|MultiMiTar|RepTar|RNAhybrid|TargetRank|TargetScan|TargetSpy
ASAP1	Q9ULH1		hsa-miR-190b	0.658757	17	Very High	BCmicrO|CoMeTa|Cupid|DIANA|ElMMo3|MBStar|microrna.org|MirAncesTar|miRDB|MirMAP|MirTar|Mirza-G|MultiMiTar|PACCMIT|RNAhybrid|TargetRank|TargetSpy
PCDH17	O14917		hsa-miR-190b	0.657922	17	Very High	BCmicrO|CoMeTa|DIANA|ElMMo3|MBStar|microrna.org|MirAncesTar|miRDB|MirMAP|MirTar|Mirza-G|MultiMiTar|RepTar|RNAhybrid|TargetRank|TargetScan|TargetSpy
ADGRB3	O60242		hsa-miR-190b	0.655748	14	Very High	BCmicrO|CoMeTa|Cupid|DIANA|ElMMo3|MBStar|microrna.org|MirAncesTar|mirbase|MirMAP|PACCMIT|RepTar|RNAhybrid|TargetScan
TSHZ1	Q6ZSZ6		hsa-miR-190b	0.655593	17	Very High	BCmicrO|Cupid|DIANA|ElMMo3|MBStar|microrna.org|MirAncesTar|mirbase|miRDB|MirMAP|MirSNP|MirTar|Mirza-G|PACCMIT|RepTar|TargetScan|TargetSpy
MEX3B	Q6ZN04		hsa-miR-190b	0.654945	15	Very High	BCmicrO|Cupid|DIANA|ElMMo3|microrna.org|MirAncesTar|miRDB|MirMAP|MirTar|Mirza-G|RepTar|RNAhybrid|TargetRank|TargetScan|TargetSpy
RAB8A	P61006		hsa-miR-190b	0.653593	16	Very High	BCmicrO|CoMeTa|DIANA|ElMMo3|microrna.org|MirAncesTar|miRDB|MirMAP|MirSNP|MirTar|Mirza-G|RepTar|RNAhybrid|TargetRank|TargetScan|TargetSpy
ZNF652	Q9Y2D9		hsa-miR-190b	0.652936	17	Very High	BCmicrO|CoMeTa|Cupid|DIANA|ElMMo3|MBStar|MirAncesTar|miRDB|MirMAP|MirSNP|MirTar|Mirza-G|MultiMiTar|RepTar|TargetRank|TargetScan|TargetSpy
NRXN3	Q9HDB5		hsa-miR-190b	0.651645	17	Very High	BCmicrO|CoMeTa|Cupid|DIANA|ElMMo3|MBStar|microrna.org|MirAncesTar|miRDB|MirMAP|MirSNP|Mirza-G|RepTar|RNAhybrid|TargetRank|TargetScan|TargetSpy
TBC1D14	Q9P2M4		hsa-miR-190b	0.651023	15	Very High	BCmicrO|DIANA|ElMMo3|MBStar|microrna.org|MirAncesTar|miRDB|MirMAP|MirSNP|MirTar|Mirza-G|PACCMIT|RepTar|TargetRank|TargetScan
MFSD14B	Q5SR56		hsa-miR-190b	0.643579	15	Very High	BCmicrO|Cupid|DIANA|ElMMo3|microrna.org|MirAncesTar|miRDB|MirMAP|MirTar|Mirza-G|PACCMIT|RNAhybrid|TargetRank|TargetScan|TargetSpy
NEGR1	Q7Z3B1		hsa-miR-190b	0.643524	16	Very High	BCmicrO|Cupid|DIANA|ElMMo3|MBStar|microrna.org|MirAncesTar|miRDB|MirMAP|MirTar|Mirza-G|MultiMiTar|RepTar|RNA22|TargetScan|TargetSpy
GPHN	Q9NQX3		hsa-miR-190b	0.642477	14	Very High	BCmicrO|CoMeTa|DIANA|ElMMo3|MBStar|microrna.org|MirAncesTar|miRDB|MirMAP|MirTar|PACCMIT|RepTar|RNAhybrid|TargetScan
CDKN1B	P46527		hsa-miR-190b	0.63947	15	Very High	BCmicrO|Cupid|DIANA|ElMMo3|MBStar|microrna.org|MirAncesTar|miRDB|MirMAP|MirTar|Mirza-G|PACCMIT|RNAhybrid|TargetScan|TargetSpy
DENND5B	Q6ZUT9		hsa-miR-190b	0.638911	16	Very High	BCmicrO|CoMeTa|Cupid|DIANA|ElMMo3|MBStar|microrna.org|MirAncesTar|miRDB|MirMAP|Mirza-G|MultiMiTar|RepTar|RNAhybrid|TargetScan|TargetSpy
CAT	P04040		hsa-miR-190b	0.638364	14	Very High	BCmicrO|CoMeTa|DIANA|ElMMo3|microrna.org|MirAncesTar|mirbase|miRDB|MirMAP|Mirza-G|RepTar|TargetRank|TargetScan|TargetSpy
WDR44	Q5JSH3		hsa-miR-190b	0.637787	15	Very High	BCmicrO|CoMeTa|Cupid|DIANA|ElMMo3|MBStar|microrna.org|MirAncesTar|mirbase|miRDB|MirMAP|RepTar|RNAhybrid|TargetRank|TargetSpy
SLITRK1	Q96PX8		hsa-miR-190b	0.633152	14	Very High	BCmicrO|Cupid|DIANA|ElMMo3|MBStar|microrna.org|MirAncesTar|miRDB|MirMAP|Mirza-G|MultiMiTar|TargetRank|TargetScan|TargetSpy
RBL2	Q08999		hsa-miR-190b	0.632775	16	Very High	BCmicrO|CoMeTa|Cupid|DIANA|ElMMo3|MBStar|microrna.org|MirAncesTar|miRDB|MirMAP|MirTar|Mirza-G|RepTar|RNAhybrid|TargetRank|TargetSpy
AMMECR1	Q9Y4X0		hsa-miR-190b	0.627816	15	Very High	BCmicrO|CoMeTa|DIANA|ElMMo3|MBStar|microrna.org|MirAncesTar|miRDB|MirMAP|Mirza-G|MultiMiTar|RepTar|TargetRank|TargetScan|TargetSpy
SMAD2	Q15796		hsa-miR-190b	0.62726	15	Very High	BCmicrO|CoMeTa|DIANA|ElMMo3|MBStar|MirAncesTar|miRDB|MirMAP|MirTar|Mirza-G|MultiMiTar|RepTar|RNAhybrid|TargetRank|TargetScan
ANKRD34A	Q69YU3		hsa-miR-190b	0.626856	14	Very High	BCmicrO|Cupid|DIANA|ElMMo3|microrna.org|MirAncesTar|miRDB|MirMAP|Mirza-G|RepTar|RNA22|RNAhybrid|TargetRank|TargetScan
DICER1	Q9UPY3		hsa-miR-190b	0.626792	15	Very High	BCmicrO|CoMeTa|Cupid|DIANA|ElMMo3|MBStar|microrna.org|MirAncesTar|miRDB|MirMAP|Mirza-G|MultiMiTar|RepTar|RNAhybrid|TargetScan
TRIM36	Q9NQ86		hsa-miR-190b	0.625674	17	Very High	BCmicrO|BiTargeting|CoMeTa|DIANA|ElMMo3|MBStar|microrna.org|MirAncesTar|miRDB|MirMAP|MirSNP|MirTar|Mirza-G|PACCMIT|RepTar|RNAhybrid|TargetRank
LDLRAD4	O15165		hsa-miR-190b	0.625567	17	Very High	BCmicrO|CoMeTa|Cupid|DIANA|ElMMo3|MBStar|microrna.org|MirAncesTar|miRDB|MirMAP|Mirza-G|MultiMiTar|RepTar|RNAhybrid|TargetRank|TargetScan|TargetSpy
ARF4	P18085		hsa-miR-190b	0.621377	17	Very High	BCmicrO|CoMeTa|Cupid|DIANA|ElMMo3|MBStar|microrna.org|MirAncesTar|mirbase|miRDB|MirMAP|MirTar|Mirza-G|RepTar|RNAhybrid|TargetScan|TargetSpy
MYCBP2	O75592		hsa-miR-190b	0.620313	17	Very High	BCmicrO|CoMeTa|Cupid|DIANA|ElMMo3|MBStar|microrna.org|MirAncesTar|mirbase|miRDB|MirMAP|MirSNP|MirTar|Mirza-G|RepTar|RNAhybrid|TargetRank
POU3F2	P20265		hsa-miR-190b	0.619019	14	Very High	BCmicrO|CoMeTa|Cupid|DIANA|ElMMo3|MBStar|microrna.org|MirAncesTar|miRDB|MirMAP|Mirza-G|RepTar|TargetRank|TargetScan
STK24	Q9Y6E0		hsa-miR-190b	0.617982	16	Very High	BCmicrO|CoMeTa|DIANA|ElMMo3|MBStar|microrna.org|MirAncesTar|miRDB|MirMAP|MirSNP|Mirza-G|PACCMIT|RepTar|RNAhybrid|TargetRank|TargetScan
MED4	Q9NPJ6		hsa-miR-190b	0.615491	15	Very High	BCmicrO|DIANA|ElMMo3|MBStar|microrna.org|MirAncesTar|miRDB|MirMAP|MirTar|Mirza-G|RepTar|RNAhybrid|TargetRank|TargetScan|TargetSpy
WSB1	Q9Y6I7		hsa-miR-190b	0.615248	15	Very High	BCmicrO|CoMeTa|DIANA|ElMMo3|MBStar|microrna.org|MirAncesTar|miRDB|MirMAP|MirTar|Mirza-G|PACCMIT|RepTar|RNAhybrid|TargetRank
FOXP2	O15409		hsa-miR-190b	0.614657	14	Very High	BCmicrO|BiTargeting|Cupid|DIANA|ElMMo3|MBStar|microrna.org|MirAncesTar|miRDB|MirMAP|PACCMIT|RNAhybrid|TargetRank|TargetScan
LPP	Q93052		hsa-miR-190b	0.6135	17	Very High	BCmicrO|BiTargeting|CoMeTa|DIANA|ElMMo3|MBStar|microrna.org|MirAncesTar|miRDB|MirMAP|MirTar|Mirza-G|MultiMiTar|RepTar|RNAhybrid|TargetRank|TargetScan
TENM1	Q9UKZ4		hsa-miR-190b	0.612971	14	Very High	BCmicrO|CoMeTa|Cupid|DIANA|ElMMo3|MBStar|microrna.org|MirAncesTar|miRDB|MirMAP|Mirza-G|RepTar|TargetRank|TargetScan
TRIM33	Q9UPN9		hsa-miR-190b	0.612313	17	Very High	BCmicrO|CoMeTa|Cupid|DIANA|ElMMo3|MBStar|microrna.org|MirAncesTar|miRDB|MirMAP|MirTar|Mirza-G|MultiMiTar|RepTar|RNAhybrid|TargetRank|TargetSpy
RCOR1	Q9UKL0		hsa-miR-190b	0.612085	15	Very High	BCmicrO|CoMeTa|DIANA|ElMMo3|MBStar|microrna.org|MirAncesTar|miRDB|MirMAP|Mirza-G|RepTar|RNAhybrid|TargetRank|TargetScan|TargetSpy
CAND1	Q86VP6		hsa-miR-190b	0.611044	15	Very High	BCmicrO|CoMeTa|Cupid|DIANA|ElMMo3|MBStar|microrna.org|MirAncesTar|miRDB|MirMAP|Mirza-G|RepTar|RNAhybrid|TargetScan|TargetSpy
PAX3	P23760		hsa-miR-190b	0.609423	18	Very High	BCmicrO|BiTargeting|CoMeTa|Cupid|DIANA|ElMMo3|MBStar|microrna.org|MirAncesTar|mirbase|miRDB|MirMAP|MirSNP|MirTar|Mirza-G|RepTar|RNAhybrid|TargetRank
DMXL1	Q9Y485		hsa-miR-190b	0.608178	15	Very High	BCmicrO|CoMeTa|DIANA|ElMMo3|MBStar|microrna.org|MirAncesTar|miRDB|MirMAP|MirTar|Mirza-G|RepTar|RNAhybrid|TargetRank|TargetSpy
TRAM1	Q15629		hsa-miR-190b	0.60637	15	Very High	BCmicrO|CoMeTa|Cupid|DIANA|ElMMo3|MBStar|microrna.org|MirAncesTar|miRDB|MirMAP|Mirza-G|MultiMiTar|RepTar|RNAhybrid|TargetRank
MAP1B	P46821		hsa-miR-190b	0.604209	16	Very High	BCmicrO|Cupid|DIANA|ElMMo3|MBStar|microrna.org|MirAncesTar|miRDB|MirMAP|MirTar|Mirza-G|RepTar|RNAhybrid|TargetRank|TargetScan|TargetSpy
RBAK	Q9NYW8		hsa-miR-190b	0.6041	15	Very High	BCmicrO|DIANA|ElMMo3|MBStar|microrna.org|MirAncesTar|miRDB|MirMAP|MirTar|Mirza-G|RepTar|RNAhybrid|TargetRank|TargetScan|TargetSpy
PTHLH	P12272		hsa-miR-190b	0.603883	14	Very High	BCmicrO|CoMeTa|ElMMo3|MBStar|microrna.org|MirAncesTar|MirMAP|MirTar|Mirza-G|RepTar|RNAhybrid|TargetRank|TargetScan|TargetSpy
TCF3	P15923		hsa-miR-190b	0.603255	16	Very High	BCmicrO|CoMeTa|DIANA|ElMMo3|MBStar|microrna.org|MirAncesTar|mirbase|miRDB|MirMAP|MirSNP|Mirza-G|RepTar|RNAhybrid|TargetRank|TargetScan
LPGAT1	Q92604		hsa-miR-190b	0.602681	16	Very High	BCmicrO|CoMeTa|Cupid|DIANA|ElMMo3|MBStar|MirAncesTar|miRDB|MirMAP|Mirza-G|MultiMiTar|RepTar|RNA22|RNAhybrid|TargetScan|TargetSpy
ATXN7L1	Q9ULK2		hsa-miR-190b	0.602331	15	Very High	BCmicrO|CoMeTa|Cupid|DIANA|ElMMo3|MBStar|microrna.org|MirAncesTar|miRDB|MirMAP|Mirza-G|PACCMIT|RNAhybrid|TargetScan|TargetSpy
CSMD1	Q96PZ7		hsa-miR-190b	0.601156	17	Very High	BCmicrO|Cupid|DIANA|ElMMo3|MBStar|microrna.org|MirAncesTar|miRDB|MirMAP|MirSNP|MirTar|Mirza-G|MultiMiTar|PACCMIT|RNAhybrid|TargetScan|TargetSpy
TANK	Q92844		hsa-miR-190b	0.600835	15	Very High	BCmicrO|CoMeTa|Cupid|DIANA|ElMMo3|MBStar|microrna.org|MirAncesTar|mirbase|miRDB|MirMAP|RepTar|RNAhybrid|TargetRank|TargetSpy
CLOCK	O15516		hsa-miR-190b	0.600031	16	Very High	BCmicrO|CoMeTa|DIANA|ElMMo3|MBStar|microrna.org|MirAncesTar|miRDB|MirMAP|Mirza-G|PACCMIT|RepTar|RNAhybrid|TargetRank|TargetScan|TargetSpy
MRS2	Q9HD23		hsa-miR-190b	0.599486	16	Very High	BCmicrO|CoMeTa|DIANA|ElMMo3|MBStar|microrna.org|MirAncesTar|miRDB|MirMAP|MirTar|Mirza-G|PACCMIT|RepTar|RNAhybrid|TargetRank|TargetSpy
PCF11	O94913		hsa-miR-190b	0.598333	16	Very High	BCmicrO|CoMeTa|Cupid|DIANA|ElMMo3|MBStar|microrna.org|MirAncesTar|mirbase|miRDB|MirMAP|MirTar|Mirza-G|MultiMiTar|RepTar|TargetSpy
LRP1B	Q9NZR2		hsa-miR-190b	0.596485	15	Very High	BCmicrO|BiTargeting|CoMeTa|Cupid|DIANA|ElMMo3|MBStar|microrna.org|MirAncesTar|MirMAP|Mirza-G|MultiMiTar|RepTar|RNAhybrid|TargetScan
CSN2	P05814		hsa-miR-190b	0.596478	15	Very High	BCmicrO|CoMeTa|DIANA|ElMMo3|MBStar|microrna.org|MirAncesTar|mirbase|miRDB|MirMAP|MirTar|Mirza-G|RepTar|RNAhybrid|TargetRank
SRSF1	Q07955		hsa-miR-190b	0.594748	15	Very High	BCmicrO|CoMeTa|Cupid|DIANA|ElMMo3|MBStar|microrna.org|MirAncesTar|miRDB|MirMAP|Mirza-G|PACCMIT|RepTar|RNAhybrid|TargetScan
MYEF2	Q9P2K5		hsa-miR-190b	0.593707	14	Very High	BCmicrO|CoMeTa|DIANA|ElMMo3|MBStar|microrna.org|MirAncesTar|miRDB|MirMAP|Mirza-G|RepTar|RNAhybrid|TargetRank|TargetScan
HMGA2	P52926		hsa-miR-190b	0.591933	15	Very High	BCmicrO|BiTargeting|CoMeTa|DIANA|ElMMo3|MBStar|microrna.org|MirAncesTar|miRDB|MirMAP|Mirza-G|RepTar|RNAhybrid|TargetRank|TargetScan
MEGF10	Q96KG7		hsa-miR-190b	0.591694	15	Very High	BCmicrO|DIANA|ElMMo3|MBStar|microrna.org|MirAncesTar|miRDB|MirMAP|MirTar|Mirza-G|MultiMiTar|RepTar|RNAhybrid|TargetRank|TargetSpy
KCTD12	Q96CX2		hsa-miR-190b	0.590708	15	Very High	BCmicrO|CoMeTa|DIANA|ElMMo3|MBStar|microrna.org|MirAncesTar|miRDB|MirMAP|MirTar|Mirza-G|MultiMiTar|RepTar|TargetRank|TargetSpy
ASAP2	O43150		hsa-miR-190b	0.586845	13	Very High	BCmicrO|DIANA|ElMMo3|MBStar|microrna.org|MirAncesTar|miRDB|MirMAP|MirTar|Mirza-G|RepTar|TargetRank|TargetSpy
AP3D1	O14617		hsa-miR-190b	0.586104	15	Very High	BCmicrO|CoMeTa|Cupid|DIANA|ElMMo3|microrna.org|MirAncesTar|miRDB|MirMAP|Mirza-G|RepTar|RNAhybrid|TargetRank|TargetScan|TargetSpy
SCAF11	Q99590		hsa-miR-190b	0.584967	16	Very High	BCmicrO|BiTargeting|CoMeTa|ElMMo3|MBStar|microrna.org|MirAncesTar|mirbase|miRDB|MirMAP|MirSNP|MirTar|Mirza-G|RepTar|RNAhybrid|TargetRank
AP1S2	P56377		hsa-miR-190b	0.581294	14	Very High	BCmicrO|CoMeTa|ElMMo3|MBStar|microrna.org|MirAncesTar|miRDB|MirMAP|MirTar|Mirza-G|RepTar|RNAhybrid|TargetRank|TargetSpy
DOCK9	Q9BZ29		hsa-miR-190b	0.581024	14	Very High	BCmicrO|CoMeTa|Cupid|ElMMo3|MBStar|microrna.org|MirAncesTar|MirMAP|MirTar|Mirza-G|RepTar|RNAhybrid|TargetRank|TargetSpy
SNX13	Q9Y5W8		hsa-miR-190b	0.580038	14	Very High	BCmicrO|CoMeTa|Cupid|DIANA|ElMMo3|MBStar|microrna.org|MirAncesTar|MirMAP|Mirza-G|MultiMiTar|RepTar|RNAhybrid|TargetScan
SEC23A	Q15436		hsa-miR-190b	0.579166	15	Very High	BCmicrO|CoMeTa|DIANA|ElMMo3|MBStar|microrna.org|MirAncesTar|miRDB|MirMAP|MirTar|Mirza-G|RepTar|RNAhybrid|TargetRank|TargetSpy
FOXJ3	Q9UPW0		hsa-miR-190b	0.578527	14	Very High	BCmicrO|CoMeTa|DIANA|ElMMo3|MBStar|microrna.org|MirAncesTar|miRDB|MirMAP|MirTar|Mirza-G|RepTar|TargetScan|TargetSpy
CNN3	Q15417		hsa-miR-190b	0.577596	15	Very High	BCmicrO|CoMeTa|DIANA|ElMMo3|MBStar|microrna.org|MirAncesTar|mirbase|miRDB|MirMAP|MirTar|Mirza-G|RNAhybrid|TargetRank|TargetSpy
WASHC4	Q2M389		hsa-miR-190b	0.57708	15	Very High	BCmicrO|CoMeTa|DIANA|ElMMo3|MBStar|microrna.org|MirAncesTar|miRDB|MirMAP|MirTar|Mirza-G|RepTar|RNAhybrid|TargetRank|TargetSpy
F2R	P25116		hsa-miR-190b	0.574834	15	Very High	BCmicrO|CoMeTa|DIANA|ElMMo3|MBStar|microrna.org|MirAncesTar|mirbase|miRDB|MirMAP|MirTar|Mirza-G|RepTar|RNAhybrid|TargetRank
ZNF608	Q9ULD9		hsa-miR-190b	0.572904	16	Very High	BCmicrO|Cupid|DIANA|ElMMo3|MBStar|microrna.org|MirAncesTar|miRDB|MirMAP|MirSNP|Mirza-G|MultiMiTar|PACCMIT|RepTar|RNAhybrid|TargetRank
PCDH9	Q9HC56		hsa-miR-190b	0.568882	16	Very High	BCmicrO|BiTargeting|CoMeTa|Cupid|DIANA|ElMMo3|MBStar|microrna.org|MirAncesTar|miRDB|MirMAP|MirTar|Mirza-G|RepTar|RNAhybrid|TargetRank
ROBO2	Q9HCK4		hsa-miR-190b	0.565959	14	Very High	BCmicrO|BiTargeting|CoMeTa|Cupid|DIANA|ElMMo3|MBStar|microrna.org|MirAncesTar|miRDB|MirMAP|Mirza-G|RNAhybrid|TargetScan
MAGI2	Q86UL8		hsa-miR-190b	0.5659	15	Very High	BCmicrO|CoMeTa|Cupid|DIANA|ElMMo3|MBStar|microrna.org|MirAncesTar|miRDB|MirMAP|MirSNP|Mirza-G|PACCMIT|RNAhybrid|TargetScan
CA10	Q9NS85		hsa-miR-190b	0.564326	15	Very High	BCmicrO|CoMeTa|Cupid|DIANA|ElMMo3|MBStar|microrna.org|MirAncesTar|miRDB|MirMAP|Mirza-G|RepTar|RNAhybrid|TargetScan|TargetSpy
ADGRE3	Q9BY15		hsa-miR-190b	0.563956	15	Very High	BCmicrO|CoMeTa|DIANA|ElMMo3|MBStar|microrna.org|MirAncesTar|mirbase|miRDB|MirMAP|MirTar|Mirza-G|RepTar|RNAhybrid|TargetRank
ANGPTL1	O95841		hsa-miR-190b	0.563766	16	Very High	BCmicrO|DIANA|ElMMo3|MBStar|microrna.org|MirAncesTar|mirbase|miRDB|MirMAP|MirSNP|MirTar|Mirza-G|RepTar|RNAhybrid|TargetRank|TargetSpy
GABRB2	P47870		hsa-miR-190b	0.561863	16	Very High	BCmicrO|CoMeTa|Cupid|DIANA|ElMMo3|MBStar|microrna.org|MirAncesTar|miRDB|MirMAP|MultiMiTar|PACCMIT|RepTar|RNAhybrid|TargetRank|TargetSpy
PAPOLG	Q9BWT3		hsa-miR-190b	0.560584	15	Very High	BCmicrO|BiTargeting|CoMeTa|DIANA|ElMMo3|MBStar|microrna.org|MirAncesTar|miRDB|MirMAP|Mirza-G|PACCMIT|RNAhybrid|TargetScan|TargetSpy
IGF1	P05019		hsa-miR-190b	0.558255	15	Very High	BCmicrO|CoMeTa|Cupid|DIANA|ElMMo3|MBStar|MirAncesTar|miRDB|MirMAP|Mirza-G|MultiMiTar|RepTar|RNAhybrid|TargetScan|TargetSpy
DIRAS2	Q96HU8		hsa-miR-190b	0.55704	12	Very High	BCmicrO|CoMeTa|DIANA|ElMMo3|MBStar|microrna.org|miRDB|MirMAP|Mirza-G|TargetRank|TargetScan|TargetSpy
NFIB	O00712		hsa-miR-190b	0.555808	13	Very High	BCmicrO|CoMeTa|Cupid|DIANA|ElMMo3|MBStar|MirAncesTar|MirMAP|Mirza-G|MultiMiTar|RepTar|RNAhybrid|TargetScan
KCTD3	Q9Y597		hsa-miR-190b	0.553653	15	Very High	BCmicrO|CoMeTa|DIANA|ElMMo3|MBStar|microrna.org|MirAncesTar|mirbase|miRDB|MirMAP|MirTar|Mirza-G|RepTar|RNAhybrid|TargetRank
ZNF280C	Q8ND82		hsa-miR-190b	0.553055	14	Very High	BCmicrO|DIANA|ElMMo3|MBStar|microrna.org|MirAncesTar|miRDB|MirMAP|MirSNP|Mirza-G|RepTar|TargetRank|TargetScan|TargetSpy
IKZF2	Q9UKS7		hsa-miR-190b	0.55303	16	Very High	BCmicrO|CoMeTa|DIANA|ElMMo3|MBStar|microrna.org|MirAncesTar|miRDB|MirMAP|MirTar|Mirza-G|MultiMiTar|RepTar|RNAhybrid|TargetRank|TargetSpy
FGF14	Q92915		hsa-miR-190b	0.551439	11	Very High	BCmicrO|BiTargeting|Cupid|ElMMo3|MBStar|microrna.org|MirAncesTar|miRDB|Mirza-G|TargetScan|TargetSpy
RAB10	P61026		hsa-miR-190b	0.550145	14	Very High	BCmicrO|Cupid|DIANA|ElMMo3|MBStar|microrna.org|MirAncesTar|miRDB|MirMAP|Mirza-G|RepTar|TargetRank|TargetScan|TargetSpy
CALCR	P30988		hsa-miR-190b	0.549003	16	Very High	BCmicrO|BiTargeting|CoMeTa|DIANA|ElMMo3|MBStar|microrna.org|MirAncesTar|mirbase|miRDB|MirMAP|MirTar|Mirza-G|RepTar|RNAhybrid|TargetRank
METAP1	P53582		hsa-miR-190b	0.548575	14	Very High	BCmicrO|CoMeTa|DIANA|ElMMo3|MBStar|microrna.org|MirAncesTar|miRDB|MirMAP|MirSNP|Mirza-G|RepTar|RNAhybrid|TargetScan
TNRC6C	Q9HCJ0		hsa-miR-190b	0.548394	14	Very High	BCmicrO|Cupid|DIANA|ElMMo3|MBStar|microrna.org|MirAncesTar|miRDB|MirMAP|MirTar|Mirza-G|PACCMIT|RNAhybrid|TargetScan
CEP170	Q5SW79		hsa-miR-190b	0.548038	14	Very High	BCmicrO|CoMeTa|Cupid|DIANA|ElMMo3|MBStar|microrna.org|MirAncesTar|miRDB|MirMAP|Mirza-G|RepTar|RNAhybrid|TargetScan
ISOC1	Q96CN7		hsa-miR-190b	0.547931	13	Very High	BCmicrO|CoMeTa|DIANA|ElMMo3|MBStar|microrna.org|MirAncesTar|miRDB|MirMAP|MirTar|Mirza-G|TargetRank|TargetSpy
NRG3	P56975		hsa-miR-190b	0.542906	11	Very High	Cupid|DIANA|ElMMo3|MBStar|microrna.org|MirAncesTar|miRDB|MirMAP|Mirza-G|RNAhybrid|TargetScan
XPO1	O14980		hsa-miR-190b	0.542561	12	Very High	BCmicrO|CoMeTa|Cupid|DIANA|ElMMo3|microrna.org|MirAncesTar|MirMAP|Mirza-G|RepTar|RNAhybrid|TargetScan
DCUN1D1	Q96GG9		hsa-miR-190b	0.541609	12	Very High	BCmicrO|CoMeTa|Cupid|DIANA|ElMMo3|microrna.org|MirAncesTar|MirMAP|Mirza-G|RepTar|RNAhybrid|TargetRank
GAN	Q9H2C0		hsa-miR-190b	0.539524	14	Very High	BCmicrO|BiTargeting|CoMeTa|Cupid|DIANA|ElMMo3|MBStar|microrna.org|MirAncesTar|miRDB|MirMAP|Mirza-G|RepTar|TargetScan
RGL1	Q9NZL6		hsa-miR-190b	0.537657	15	Very High	BCmicrO|CoMeTa|DIANA|ElMMo3|MBStar|microrna.org|MirAncesTar|miRDB|MirMAP|MirSNP|MirTar|Mirza-G|RepTar|RNA22|TargetRank
SLC35F5	Q8WV83		hsa-miR-190b	0.537494	12	Very High	BCmicrO|CoMeTa|DIANA|ElMMo3|microrna.org|MirAncesTar|miRDB|MirMAP|Mirza-G|RNAhybrid|TargetRank|TargetScan
FGF2	P09038		hsa-miR-190b	0.537458	13	Very High	BCmicrO|CoMeTa|Cupid|DIANA|ElMMo3|MBStar|microrna.org|MirAncesTar|miRDB|MirMAP|MultiMiTar|TargetScan|TargetSpy
KLHL7	Q8IXQ5		hsa-miR-190b	0.536286	15	Very High	BCmicrO|CoMeTa|Cupid|DIANA|ElMMo3|MBStar|microrna.org|MirAncesTar|miRDB|MirMAP|MirTar|Mirza-G|RepTar|RNAhybrid|TargetRank
CPOX	P36551		hsa-miR-190b	0.536131	16	Very High	BCmicrO|CoMeTa|DIANA|ElMMo3|MBStar|microrna.org|MirAncesTar|miRDB|MirMAP|MirSNP|MirTar|Mirza-G|RepTar|RNAhybrid|TargetRank|TargetSpy
PPP3R1	P63098		hsa-miR-190b	0.536077	13	Very High	BCmicrO|Cupid|DIANA|ElMMo3|MBStar|microrna.org|MirAncesTar|MirMAP|Mirza-G|MultiMiTar|RepTar|RNAhybrid|TargetScan
CKAP2	Q8WWK9		hsa-miR-190b	0.535662	15	Very High	BCmicrO|CoMeTa|DIANA|ElMMo3|MBStar|microrna.org|MirAncesTar|mirbase|miRDB|MirMAP|MirTar|Mirza-G|RepTar|RNAhybrid|TargetRank
STK35	Q8TDR2		hsa-miR-190b	0.535168	14	Very High	BCmicrO|BiTargeting|DIANA|ElMMo3|MBStar|microrna.org|MirAncesTar|miRDB|MirMAP|Mirza-G|PACCMIT|RepTar|TargetRank|TargetScan
PSMA8	Q8TAA3		hsa-miR-190b	0.534033	15	Very High	BCmicrO|DIANA|ElMMo3|MBStar|microrna.org|MirAncesTar|mirbase|miRDB|MirMAP|MirTar|Mirza-G|RepTar|RNAhybrid|TargetRank|TargetSpy
TNPO1	Q92973		hsa-miR-190b	0.533816	14	Very High	BCmicrO|DIANA|ElMMo3|MBStar|microrna.org|MirAncesTar|miRDB|MirMAP|Mirza-G|MultiMiTar|RepTar|RNAhybrid|TargetRank|TargetScan
TRA2B	P62995		hsa-miR-190b	0.533673	15	Very High	BCmicrO|CoMeTa|DIANA|ElMMo3|MBStar|microrna.org|MirAncesTar|miRDB|MirMAP|MirTar|Mirza-G|RepTar|RNAhybrid|TargetRank|TargetSpy
LRRTM2	O43300		hsa-miR-190b	0.533294	16	Very High	BCmicrO|BiTargeting|CoMeTa|Cupid|DIANA|ElMMo3|MBStar|microrna.org|MirAncesTar|miRDB|MirMAP|MirTar|Mirza-G|RepTar|RNAhybrid|TargetRank
EFR3A	Q14156		hsa-miR-190b	0.532886	14	Very High	BCmicrO|DIANA|ElMMo3|MBStar|microrna.org|MirAncesTar|miRDB|MirMAP|MirSNP|MirTar|Mirza-G|RepTar|TargetRank|TargetSpy
MMAA	Q8IVH4		hsa-miR-190b	0.532733	13	Very High	BCmicrO|DIANA|ElMMo3|MBStar|microrna.org|MirAncesTar|miRDB|MirMAP|MirTar|RepTar|RNAhybrid|TargetRank|TargetSpy
FBXO33	Q7Z6M2		hsa-miR-190b	0.531282	15	Very High	BCmicrO|DIANA|ElMMo3|MBStar|microrna.org|MirAncesTar|miRDB|MirMAP|MirSNP|MirTar|Mirza-G|MultiMiTar|RNAhybrid|TargetRank|TargetSpy
CREB5	Q02930		hsa-miR-190b	0.530032	15	Very High	BCmicrO|CoMeTa|Cupid|DIANA|ElMMo3|MBStar|microrna.org|MirAncesTar|miRDB|MirMAP|Mirza-G|MultiMiTar|RepTar|RNAhybrid|TargetRank
AK4	P27144		hsa-miR-190b	0.528351	15	Very High	BCmicrO|CoMeTa|DIANA|ElMMo3|MBStar|microrna.org|MirAncesTar|miRDB|MirMAP|MirTar|Mirza-G|RepTar|RNAhybrid|TargetRank|TargetSpy
NPNT	Q6UXI9		hsa-miR-190b	0.527779	14	Very High	BCmicrO|DIANA|ElMMo3|MBStar|microrna.org|MirAncesTar|miRDB|MirMAP|MirSNP|Mirza-G|RepTar|RNAhybrid|TargetRank|TargetScan
PCNX4	Q63HM2		hsa-miR-190b	0.527148	14	Very High	BCmicrO|CoMeTa|ElMMo3|MBStar|microrna.org|MirAncesTar|mirbase|miRDB|MirMAP|MirTar|Mirza-G|RepTar|RNAhybrid|TargetRank
ANO4	Q32M45		hsa-miR-190b	0.526141	15	Very High	BCmicrO|Cupid|DIANA|ElMMo3|MBStar|microrna.org|MirAncesTar|mirbase|miRDB|MirMAP|MirTar|Mirza-G|PACCMIT|RNAhybrid|TargetSpy
RNF125	Q96EQ8		hsa-miR-190b	0.525562	15	Very High	BCmicrO|CoMeTa|DIANA|ElMMo3|MBStar|microrna.org|MirAncesTar|miRDB|MirMAP|MirTar|Mirza-G|RepTar|RNAhybrid|TargetRank|TargetSpy
USP15	Q9Y4E8		hsa-miR-190b	0.524382	12	Very High	BCmicrO|CoMeTa|Cupid|DIANA|ElMMo3|MBStar|microrna.org|MirAncesTar|miRDB|MirMAP|RNAhybrid|TargetScan
CEBPA	P49715		hsa-miR-190b	0.523933	9	Very High	BCmicrO|DIANA|ElMMo3|MBStar|microrna.org|MirAncesTar|miRDB|MirMAP|TargetScan
NOLC1	Q14978		hsa-miR-190b	0.521941	14	Very High	BCmicrO|DIANA|ElMMo3|MBStar|microrna.org|MirAncesTar|miRDB|MirMAP|MirTar|Mirza-G|RNAhybrid|TargetRank|TargetScan|TargetSpy
MYH10	P35580		hsa-miR-190b	0.519913	16	Very High	BCmicrO|BiTargeting|CoMeTa|Cupid|DIANA|ElMMo3|MBStar|microrna.org|MirAncesTar|mirbase|MirMAP|Mirza-G|MultiMiTar|RepTar|RNAhybrid|TargetSpy
ATG7	O95352		hsa-miR-190b	0.519029	12	Very High	BCmicrO|DIANA|ElMMo3|MBStar|microrna.org|MirAncesTar|miRDB|MirMAP|MirTar|Mirza-G|RNAhybrid|TargetScan
UFM1	P61960		hsa-miR-190b	0.518965	16	Very High	BCmicrO|CoMeTa|DIANA|ElMMo3|MBStar|microrna.org|MirAncesTar|mirbase|miRDB|MirMAP|MirSNP|Mirza-G|RepTar|RNAhybrid|TargetRank|TargetSpy
COQ10B	Q9H8M1		hsa-miR-190b	0.518045	13	Very High	BCmicrO|Cupid|DIANA|ElMMo3|MBStar|microrna.org|MirAncesTar|MirMAP|Mirza-G|RepTar|RNAhybrid|TargetScan|TargetSpy
CACNA1D	Q01668		hsa-miR-190b	0.517269	14	Very High	BCmicrO|BiTargeting|CoMeTa|Cupid|DIANA|ElMMo3|microrna.org|MirAncesTar|mirbase|MirMAP|Mirza-G|RepTar|RNAhybrid|TargetRank
PRDM2	Q13029		hsa-miR-190b	0.517138	15	Very High	BCmicrO|CoMeTa|Cupid|DIANA|ElMMo3|MBStar|microrna.org|MirAncesTar|MirMAP|Mirza-G|RepTar|RNA22|RNAhybrid|TargetRank|TargetSpy
CELF6	Q96J87		hsa-miR-190b	0.516962	12	Very High	BCmicrO|Cupid|DIANA|ElMMo3|MBStar|microrna.org|MirAncesTar|MirMAP|Mirza-G|RepTar|RNAhybrid|TargetScan
HNRNPA2B1	P22626		hsa-miR-190b	0.516647	14	Very High	BCmicrO|Cupid|DIANA|ElMMo3|MBStar|microrna.org|MirAncesTar|miRDB|MirMAP|Mirza-G|PACCMIT|RepTar|RNAhybrid|TargetScan
MB21D2	Q8IYB1		hsa-miR-190b	0.516463	14	Very High	BCmicrO|DIANA|ElMMo3|MBStar|microrna.org|MirAncesTar|miRDB|MirMAP|MirSNP|Mirza-G|PACCMIT|RNAhybrid|TargetScan|TargetSpy
PPCS	Q9HAB8		hsa-miR-190b	0.516138	14	Very High	BCmicrO|CoMeTa|DIANA|ElMMo3|microrna.org|MirAncesTar|mirbase|miRDB|MirMAP|Mirza-G|RepTar|RNAhybrid|TargetRank|TargetSpy
LMBRD2	Q68DH5		hsa-miR-190b	0.515366	14	Very High	BCmicrO|DIANA|ElMMo3|MBStar|microrna.org|MirAncesTar|mirbase|miRDB|MirMAP|MirTar|Mirza-G|RepTar|TargetRank|TargetSpy
EPB41L4B	Q9H329		hsa-miR-190b	0.515228	14	Very High	BCmicrO|CoMeTa|DIANA|ElMMo3|MBStar|microrna.org|MirAncesTar|miRDB|MirMAP|MirTar|Mirza-G|RepTar|TargetRank|TargetSpy
POLI	Q9UNA4		hsa-miR-190b	0.51499	15	Very High	BCmicrO|DIANA|ElMMo3|MBStar|microrna.org|MirAncesTar|miRDB|MirMAP|MirTar|Mirza-G|MultiMiTar|RepTar|RNAhybrid|TargetRank|TargetSpy
STK17A	Q9UEE5		hsa-miR-190b	0.514655	13	Very High	BCmicrO|CoMeTa|DIANA|ElMMo3|MBStar|microrna.org|MirAncesTar|miRDB|MirMAP|MirTar|Mirza-G|RepTar|TargetRank
FNDC3B	Q53EP0		hsa-miR-190b	0.513124	12	Very High	BCmicrO|CoMeTa|Cupid|DIANA|ElMMo3|MBStar|microrna.org|MirAncesTar|MirMAP|Mirza-G|RNAhybrid|TargetScan
KPNA4	O00629		hsa-miR-190b	0.513075	10	Very High	BCmicrO|CoMeTa|Cupid|DIANA|ElMMo3|MBStar|microrna.org|MirAncesTar|MirMAP|TargetScan
RFK	Q969G6		hsa-miR-190b	0.512912	15	Very High	BCmicrO|DIANA|ElMMo3|MBStar|microrna.org|MirAncesTar|miRDB|MirMAP|MirSNP|MirTar|Mirza-G|RepTar|RNAhybrid|TargetRank|TargetSpy
MPZL1	O95297		hsa-miR-190b	0.512081	16	Very High	BCmicrO|CoMeTa|DIANA|ElMMo3|MBStar|microrna.org|MirAncesTar|mirbase|miRDB|MirMAP|MirTar|Mirza-G|RepTar|RNA22|RNAhybrid|TargetRank
ACBD3	Q9H3P7		hsa-miR-190b	0.511735	15	Very High	BCmicrO|CoMeTa|DIANA|ElMMo3|MBStar|microrna.org|MirAncesTar|miRDB|MirMAP|Mirza-G|RepTar|RNA22|RNAhybrid|TargetRank|TargetSpy
CROT	Q9UKG9		hsa-miR-190b	0.510744	13	Very High	BCmicrO|Cupid|DIANA|ElMMo3|MBStar|microrna.org|MirAncesTar|miRDB|MirMAP|MirTar|RepTar|RNAhybrid|TargetRank
USF3	Q68DE3		hsa-miR-190b	0.509711	12	Very High	BCmicrO|DIANA|ElMMo3|microrna.org|MirAncesTar|miRDB|MirMAP|MirTar|MultiMiTar|RepTar|RNAhybrid|TargetScan
BOC	Q9BWV1		hsa-miR-190b	0.508945	14	Very High	BCmicrO|Cupid|ElMMo3|MBStar|microrna.org|MirAncesTar|mirbase|miRDB|MirMAP|Mirza-G|PACCMIT|RNAhybrid|TargetRank|TargetSpy
MFSD6	Q6ZSS7		hsa-miR-190b	0.505221	14	Very High	BCmicrO|CoMeTa|Cupid|DIANA|ElMMo3|MBStar|microrna.org|MirAncesTar|miRDB|MirMAP|MirTar|Mirza-G|RNAhybrid|TargetSpy
SLC25A5	P05141		hsa-miR-190b	0.504772	13	Very High	BCmicrO|CoMeTa|Cupid|DIANA|ElMMo3|MBStar|microrna.org|MirAncesTar|mirbase|miRDB|MirMAP|Mirza-G|TargetSpy
NPAS2	Q99743		hsa-miR-190b	0.503964	13	Very High	BCmicrO|CoMeTa|Cupid|DIANA|ElMMo3|MBStar|microrna.org|MirAncesTar|miRDB|MirMAP|Mirza-G|TargetRank|TargetSpy
FBN1	P35555		hsa-miR-190b	0.50387	10	Very High	BCmicrO|CoMeTa|Cupid|ElMMo3|MBStar|MirAncesTar|MirMAP|Mirza-G|RepTar|TargetScan
LARP4	Q71RC2		hsa-miR-190b	0.503105	15	Very High	BCmicrO|CoMeTa|DIANA|ElMMo3|MBStar|microrna.org|MirAncesTar|miRDB|MirMAP|Mirza-G|MultiMiTar|RepTar|RNAhybrid|TargetRank|TargetSpy
MIER1	Q8N108		hsa-miR-190b	0.50039	16	Very High	BCmicrO|DIANA|ElMMo3|MBStar|microrna.org|MirAncesTar|miRDB|MirMAP|MirTar|Mirza-G|MultiMiTar|RepTar|RNA22|RNAhybrid|TargetRank|TargetSpy
NFASC	O94856		hsa-miR-190b	0.50033	14	Very High	BCmicrO|DIANA|ElMMo3|MBStar|MirAncesTar|miRDB|MirMAP|MirSNP|Mirza-G|PACCMIT|RepTar|RNAhybrid|TargetRank|TargetScan
SAMD8	Q96LT4		hsa-miR-190b	0.500053	11	Very High	BCmicrO|Cupid|ElMMo3|MBStar|microrna.org|MirAncesTar|MirMAP|Mirza-G|RepTar|RNAhybrid|TargetScan
TMEM45B	Q96B21		hsa-miR-190b	0.499821	14	Very High	BCmicrO|DIANA|ElMMo3|MBStar|microrna.org|MirAncesTar|mirbase|miRDB|MirMAP|MirTar|Mirza-G|RepTar|RNAhybrid|TargetRank
AGPAT5	Q9NUQ2		hsa-miR-190b	0.499332	15	Very High	BCmicrO|CoMeTa|DIANA|ElMMo3|MBStar|microrna.org|MirAncesTar|miRDB|MirMAP|MirSNP|Mirza-G|RepTar|RNAhybrid|TargetRank|TargetSpy
PPP2R2C	Q9Y2T4		hsa-miR-190b	0.499097	14	Very High	BCmicrO|Cupid|DIANA|ElMMo3|MBStar|microrna.org|MirAncesTar|miRDB|MirMAP|MirTar|Mirza-G|RepTar|RNAhybrid|TargetRank
PPP2R5C	Q13362		hsa-miR-190b	0.498763	14	Very High	BCmicrO|CoMeTa|DIANA|ElMMo3|MBStar|microrna.org|MirAncesTar|miRDB|MirMAP|MirTar|Mirza-G|RepTar|RNAhybrid|TargetRank
TNKS	O95271		hsa-miR-190b	0.498026	14	Very High	BCmicrO|CoMeTa|DIANA|ElMMo3|MBStar|microrna.org|MirAncesTar|miRDB|MirMAP|Mirza-G|RepTar|RNAhybrid|TargetScan|TargetSpy
SLC2A2	P11168		hsa-miR-190b	0.497679	14	Very High	BCmicrO|DIANA|ElMMo3|MBStar|microrna.org|MirAncesTar|miRDB|MirMAP|MirTar|Mirza-G|PACCMIT|RepTar|RNAhybrid|TargetRank
XRN1	Q8IZH2		hsa-miR-190b	0.497471	14	Very High	BCmicrO|DIANA|ElMMo3|MBStar|microrna.org|MirAncesTar|miRDB|MirMAP|MirTar|Mirza-G|MultiMiTar|RepTar|RNAhybrid|TargetSpy
TRIM55	Q9BYV6		hsa-miR-190b	0.496905	14	Very High	BCmicrO|DIANA|ElMMo3|MBStar|microrna.org|MirAncesTar|miRDB|MirMAP|MirTar|Mirza-G|RepTar|RNAhybrid|TargetRank|TargetSpy
PLCB4	Q15147		hsa-miR-190b	0.496338	14	Very High	BCmicrO|DIANA|ElMMo3|MBStar|microrna.org|MirAncesTar|miRDB|MirMAP|MirSNP|Mirza-G|RNAhybrid|TargetRank|TargetScan|TargetSpy
ZADH2	Q8N4Q0		hsa-miR-190b	0.495782	14	Very High	BCmicrO|DIANA|ElMMo3|MBStar|microrna.org|MirAncesTar|miRDB|MirMAP|Mirza-G|RepTar|RNAhybrid|TargetRank|TargetScan|TargetSpy
PSD3	Q9NYI0		hsa-miR-190b	0.495742	14	Very High	BCmicrO|CoMeTa|DIANA|ElMMo3|MBStar|MirAncesTar|mirbase|miRDB|MirMAP|Mirza-G|MultiMiTar|RepTar|RNAhybrid|TargetRank
ZNF229	Q9UJW7		hsa-miR-190b	0.495412	14	Very High	BCmicrO|DIANA|ElMMo3|MBStar|microrna.org|MirAncesTar|miRDB|MirMAP|MirTar|Mirza-G|RepTar|RNAhybrid|TargetRank|TargetSpy
MPP6	Q9NZW5		hsa-miR-190b	0.495189	11	Very High	BCmicrO|Cupid|DIANA|ElMMo3|MBStar|microrna.org|miRDB|MirMAP|RNAhybrid|TargetScan|TargetSpy
IL1RAP	Q9NPH3		hsa-miR-190b	0.493585	15	Very High	BCmicrO|CoMeTa|DIANA|ElMMo3|MBStar|microrna.org|MirAncesTar|miRDB|MirMAP|Mirza-G|MultiMiTar|RepTar|RNAhybrid|TargetRank|TargetSpy
TOMM5	Q8N4H5		hsa-miR-190b	0.493072	13	Very High	BCmicrO|ElMMo3|MBStar|microrna.org|MirAncesTar|mirbase|miRDB|MirMAP|MirTar|RepTar|RNAhybrid|TargetRank|TargetSpy
KCTD9	Q7L273		hsa-miR-190b	0.492701	15	Very High	BCmicrO|CoMeTa|Cupid|DIANA|ElMMo3|MBStar|microrna.org|MirAncesTar|miRDB|MirMAP|MirSNP|Mirza-G|MultiMiTar|RNAhybrid|TargetSpy
BTBD3	Q9Y2F9		hsa-miR-190b	0.49234	15	Very High	BCmicrO|CoMeTa|DIANA|ElMMo3|MBStar|microrna.org|MirAncesTar|miRDB|MirMAP|MirSNP|Mirza-G|RepTar|RNAhybrid|TargetRank|TargetSpy
RGS5	O15539		hsa-miR-190b	0.492284	16	Very High	BCmicrO|CoMeTa|DIANA|ElMMo3|MBStar|microrna.org|MirAncesTar|mirbase|miRDB|MirMAP|Mirza-G|MultiMiTar|RepTar|RNA22|RNAhybrid|TargetSpy
HECW2	Q9P2P5		hsa-miR-190b	0.490169	11	Very High	BCmicrO|Cupid|DIANA|ElMMo3|MBStar|microrna.org|MirAncesTar|MirMAP|Mirza-G|RepTar|TargetScan
FOXP1	Q9H334		hsa-miR-190b	0.489618	14	Very High	BCmicrO|CoMeTa|Cupid|DIANA|ElMMo3|MBStar|microrna.org|MirAncesTar|miRDB|MirMAP|Mirza-G|MultiMiTar|RNAhybrid|TargetSpy
DIRC2	Q96SL1		hsa-miR-190b	0.489105	13	Very High	BCmicrO|DIANA|ElMMo3|MBStar|microrna.org|MirAncesTar|mirbase|miRDB|MirMAP|Mirza-G|RepTar|RNAhybrid|TargetScan
ZFP1	Q6P2D0		hsa-miR-190b	0.489082	13	Very High	BCmicrO|DIANA|ElMMo3|microrna.org|MirAncesTar|miRDB|MirMAP|MirTar|Mirza-G|RepTar|RNAhybrid|TargetRank|TargetSpy
RCAN2	Q14206		hsa-miR-190b	0.488882	12	Very High	BCmicrO|BiTargeting|CoMeTa|Cupid|DIANA|ElMMo3|MBStar|MirAncesTar|MirMAP|RepTar|TargetScan|TargetSpy
MEAF6	Q9HAF1		hsa-miR-190b	0.487284	14	Very High	BCmicrO|CoMeTa|DIANA|ElMMo3|MBStar|microrna.org|MirAncesTar|miRDB|MirMAP|Mirza-G|RepTar|RNA22|RNAhybrid|TargetRank
EPB41	P11171		hsa-miR-190b	0.486519	16	Very High	BCmicrO|CoMeTa|DIANA|ElMMo3|MBStar|microrna.org|MirAncesTar|miRDB|MirMAP|MirSNP|Mirza-G|RepTar|RNA22|RNAhybrid|TargetRank|TargetSpy
NCOA7	Q8NI08		hsa-miR-190b	0.486366	14	Very High	BCmicrO|DIANA|ElMMo3|MBStar|microrna.org|MirAncesTar|miRDB|MirMAP|Mirza-G|MultiMiTar|RepTar|RNAhybrid|TargetRank|TargetSpy
CNTD1	Q8N815		hsa-miR-190b	0.485902	13	Very High	BCmicrO|DIANA|ElMMo3|MBStar|microrna.org|MirAncesTar|mirbase|miRDB|MirMAP|Mirza-G|RepTar|RNAhybrid|TargetRank
SF3A3	Q12874		hsa-miR-190b	0.485618	16	Very High	BCmicrO|BiTargeting|CoMeTa|DIANA|ElMMo3|MBStar|microrna.org|MirAncesTar|mirbase|miRDB|MirMAP|MirSNP|Mirza-G|RepTar|RNAhybrid|TargetRank
CREB1	P16220		hsa-miR-190b	0.485413	13	Very High	BCmicrO|CoMeTa|Cupid|DIANA|ElMMo3|MBStar|MirAncesTar|miRDB|MirMAP|MirSNP|RepTar|RNAhybrid|TargetScan
FNIP1	Q8TF40		hsa-miR-190b	0.485303	15	Very High	BCmicrO|DIANA|ElMMo3|MBStar|microrna.org|MirAncesTar|miRDB|MirMAP|MirSNP|MirTar|Mirza-G|RepTar|RNAhybrid|TargetRank|TargetSpy
AGFG1	P52594		hsa-miR-190b	0.485251	11	Very High	BCmicrO|CoMeTa|DIANA|ElMMo3|MBStar|MirAncesTar|MirMAP|Mirza-G|RepTar|RNAhybrid|TargetScan
ZNF275	Q9NSD4		hsa-miR-190b	0.484181	13	Very High	BCmicrO|DIANA|ElMMo3|MBStar|microrna.org|MirAncesTar|miRDB|MirMAP|Mirza-G|PACCMIT|RepTar|TargetRank|TargetSpy
MBLAC2	Q68D91		hsa-miR-190b	0.48267	12	Very High	BCmicrO|DIANA|ElMMo3|MBStar|microrna.org|MirAncesTar|miRDB|MirMAP|MirTar|Mirza-G|RNAhybrid|TargetSpy
DEPDC5	O75140		hsa-miR-190b	0.482382	14	Very High	BCmicrO|CoMeTa|DIANA|ElMMo3|MBStar|microrna.org|MirAncesTar|mirbase|MirMAP|MirTar|RepTar|RNAhybrid|TargetRank|TargetSpy
LRP11	Q86VZ4		hsa-miR-190b	0.482245	12	Very High	BCmicrO|DIANA|ElMMo3|MBStar|microrna.org|MirAncesTar|MirMAP|MirTar|Mirza-G|RepTar|TargetRank|TargetSpy
NADK2	Q4G0N4		hsa-miR-190b	0.481726	13	Very High	BCmicrO|DIANA|ElMMo3|MBStar|microrna.org|MirAncesTar|miRDB|MirMAP|MirTar|Mirza-G|RepTar|RNAhybrid|TargetRank
COL11A1	P12107		hsa-miR-190b	0.480879	15	Very High	BCmicrO|CoMeTa|Cupid|ElMMo3|MBStar|microrna.org|MirAncesTar|mirbase|miRDB|MirMAP|RepTar|RNA22|RNAhybrid|TargetRank|TargetSpy
RNF144B	Q7Z419		hsa-miR-190b	0.480573	13	Very High	BCmicrO|DIANA|ElMMo3|MBStar|microrna.org|MirAncesTar|miRDB|MirMAP|MirTar|Mirza-G|RepTar|TargetRank|TargetSpy
GYG1	P46976		hsa-miR-190b	0.479787	14	Very High	BCmicrO|DIANA|ElMMo3|MBStar|microrna.org|MirAncesTar|mirbase|miRDB|MirMAP|MirTar|Mirza-G|RepTar|RNAhybrid|TargetRank
SLC17A6	Q9P2U8		hsa-miR-190b	0.479147	12	Very High	BCmicrO|CoMeTa|Cupid|DIANA|ElMMo3|MBStar|MirAncesTar|MirMAP|Mirza-G|RepTar|RNAhybrid|TargetScan
ARPP21	Q9UBL0		hsa-miR-190b	0.478693	12	Very High	BCmicrO|CoMeTa|Cupid|DIANA|ElMMo3|MBStar|microrna.org|MirAncesTar|MirMAP|MultiMiTar|RepTar|RNAhybrid
SEMA3D	O95025		hsa-miR-190b	0.478658	14	Very High	BCmicrO|CoMeTa|DIANA|ElMMo3|MBStar|microrna.org|MirAncesTar|miRDB|MirMAP|MultiMiTar|RepTar|RNAhybrid|TargetRank|TargetSpy
DCLK1	O15075		hsa-miR-190b	0.477929	13	Very High	BCmicrO|Cupid|ElMMo3|MBStar|microrna.org|MirAncesTar|miRDB|MirMAP|MirTar|Mirza-G|RepTar|RNAhybrid|TargetScan
MFAP3L	O75121		hsa-miR-190b	0.477199	11	Very High	BCmicrO|CoMeTa|Cupid|ElMMo3|MBStar|MirAncesTar|MirMAP|MultiMiTar|RepTar|RNAhybrid|TargetScan
CSDE1	O75534		hsa-miR-190b	0.476878	14	Very High	BCmicrO|CoMeTa|Cupid|DIANA|ElMMo3|MBStar|microrna.org|MirAncesTar|MirMAP|Mirza-G|RepTar|RNA22|RNAhybrid|TargetSpy
BLOC1S6	Q9UL45		hsa-miR-190b	0.476746	14	Very High	BCmicrO|DIANA|ElMMo3|MBStar|microrna.org|MirAncesTar|miRDB|MirMAP|MirSNP|Mirza-G|RepTar|RNAhybrid|TargetRank|TargetScan
TMF1	P82094		hsa-miR-190b	0.476255	15	Very High	BCmicrO|BiTargeting|DIANA|ElMMo3|MBStar|microrna.org|MirAncesTar|mirbase|miRDB|MirMAP|Mirza-G|MultiMiTar|RepTar|TargetRank|TargetSpy
ENOX2	Q16206		hsa-miR-190b	0.473983	13	Very High	BCmicrO|CoMeTa|DIANA|ElMMo3|MBStar|microrna.org|MirAncesTar|miRDB|MirMAP|Mirza-G|RepTar|RNAhybrid|TargetRank
FRMD6	Q96NE9		hsa-miR-190b	0.473209	14	Very High	BCmicrO|DIANA|ElMMo3|MBStar|microrna.org|MirAncesTar|miRDB|MirMAP|Mirza-G|MultiMiTar|RepTar|RNAhybrid|TargetRank|TargetSpy
PDS5A	Q29RF7		hsa-miR-190b	0.472764	13	Very High	BCmicrO|CoMeTa|Cupid|DIANA|ElMMo3|MBStar|microrna.org|MirAncesTar|MirMAP|Mirza-G|MultiMiTar|RepTar|RNAhybrid
C6orf120	Q7Z4R8		hsa-miR-190b	0.47244	13	Very High	BCmicrO|CoMeTa|DIANA|ElMMo3|MBStar|microrna.org|MirAncesTar|miRDB|MirMAP|Mirza-G|MultiMiTar|RepTar|TargetRank
ZNF697	Q5TEC3		hsa-miR-190b	0.4721	14	Very High	BCmicrO|BiTargeting|DIANA|ElMMo3|MBStar|microrna.org|MirAncesTar|miRDB|MirMAP|Mirza-G|RepTar|RNA22|TargetRank|TargetSpy
ELOVL5	Q9NYP7		hsa-miR-190b	0.47205	13	Very High	BCmicrO|CoMeTa|Cupid|DIANA|ElMMo3|MBStar|microrna.org|MirAncesTar|miRDB|MirMAP|Mirza-G|RepTar|RNAhybrid
EPC2	Q52LR7		hsa-miR-190b	0.472039	9	Very High	BCmicrO|Cupid|ElMMo3|MBStar|microrna.org|MirAncesTar|RNAhybrid|TargetScan|TargetSpy
CADM1	Q9BY67		hsa-miR-190b	0.471868	13	Very High	BCmicrO|CoMeTa|DIANA|ElMMo3|MBStar|microrna.org|MirAncesTar|miRDB|MirMAP|Mirza-G|RepTar|RNAhybrid|TargetRank
RAP2B	P61225		hsa-miR-190b	0.471599	14	Very High	BCmicrO|DIANA|ElMMo3|MBStar|microrna.org|MirAncesTar|miRDB|MirMAP|MirSNP|Mirza-G|MultiMiTar|RepTar|TargetRank|TargetSpy
OR51E2	Q9H255		hsa-miR-190b	0.4709	14	Very High	BCmicrO|DIANA|ElMMo3|MBStar|microrna.org|MirAncesTar|miRDB|MirMAP|MirTar|Mirza-G|RepTar|RNAhybrid|TargetRank|TargetSpy
SCPEP1	Q9HB40		hsa-miR-190b	0.469422	13	Very High	BCmicrO|CoMeTa|ElMMo3|MBStar|microrna.org|MirAncesTar|mirbase|miRDB|MirMAP|Mirza-G|RepTar|RNAhybrid|TargetRank
PITPNA	Q00169		hsa-miR-190b	0.468769	13	Very High	BCmicrO|CoMeTa|DIANA|ElMMo3|MBStar|microrna.org|MirAncesTar|miRDB|MirMAP|Mirza-G|PACCMIT|RepTar|TargetScan
ESR1	P03372		hsa-miR-190b	0.468421	13	Very High	BCmicrO|BiTargeting|CoMeTa|Cupid|DIANA|ElMMo3|MBStar|MirAncesTar|MirMAP|RepTar|RNAhybrid|TargetScan|TargetSpy
SPTBN1	Q01082		hsa-miR-190b	0.467705	13	Very High	BCmicrO|CoMeTa|Cupid|DIANA|ElMMo3|MBStar|microrna.org|MirAncesTar|MirMAP|Mirza-G|RepTar|RNAhybrid|TargetSpy
NTS	P30990		hsa-miR-190b	0.467358	13	Very High	BCmicrO|CoMeTa|DIANA|ElMMo3|microrna.org|MirAncesTar|mirbase|miRDB|MirMAP|Mirza-G|RNAhybrid|TargetRank|TargetSpy
PRDM16	Q9HAZ2		hsa-miR-190b	0.467146	14	Very High	BCmicrO|CoMeTa|DIANA|ElMMo3|microrna.org|MirAncesTar|miRDB|MirMAP|Mirza-G|PACCMIT|RepTar|RNAhybrid|TargetScan|TargetSpy
POC1B	Q8TC44		hsa-miR-190b	0.466437	15	Very High	BCmicrO|DIANA|ElMMo3|MBStar|microrna.org|MirAncesTar|mirbase|miRDB|MirMAP|MirTar|Mirza-G|RepTar|RNAhybrid|TargetRank|TargetSpy
IL2	P60568		hsa-miR-190b	0.466158	12	Very High	BCmicrO|CoMeTa|DIANA|ElMMo3|MBStar|microrna.org|MirAncesTar|mirbase|miRDB|MirMAP|RepTar|TargetRank
CDH2	P19022		hsa-miR-190b	0.465948	10	Very High	BCmicrO|CoMeTa|Cupid|DIANA|ElMMo3|MBStar|MirMAP|Mirza-G|RNAhybrid|TargetScan
WDR72	Q3MJ13		hsa-miR-190b	0.46417	13	Very High	BCmicrO|DIANA|ElMMo3|MBStar|microrna.org|MirAncesTar|miRDB|MirMAP|Mirza-G|RepTar|RNAhybrid|TargetRank|TargetSpy
ZNF280D	Q6N043		hsa-miR-190b	0.463555	14	Very High	BCmicrO|DIANA|ElMMo3|MBStar|microrna.org|MirAncesTar|miRDB|MirMAP|MirTar|Mirza-G|RepTar|RNAhybrid|TargetRank|TargetSpy
ZNF665	Q9H7R5		hsa-miR-190b	0.462928	14	Very High	BCmicrO|DIANA|ElMMo3|microrna.org|MirAncesTar|mirbase|miRDB|MirMAP|MirTar|Mirza-G|RepTar|RNAhybrid|TargetRank|TargetSpy
RALGPS1	Q5JS13		hsa-miR-190b	0.46261	15	Very High	BCmicrO|CoMeTa|DIANA|ElMMo3|MBStar|microrna.org|MirAncesTar|miRDB|MirMAP|MirSNP|Mirza-G|RepTar|RNAhybrid|TargetRank|TargetSpy
C3orf38	Q5JPI3		hsa-miR-190b	0.462033	14	Very High	BCmicrO|DIANA|ElMMo3|MBStar|microrna.org|MirAncesTar|miRDB|MirMAP|MirTar|Mirza-G|RepTar|RNAhybrid|TargetRank|TargetSpy
LRRC31	Q6UY01		hsa-miR-190b	0.46199	13	Very High	BCmicrO|CoMeTa|DIANA|ElMMo3|MBStar|microrna.org|MirAncesTar|mirbase|miRDB|MirMAP|MirTar|RepTar|RNAhybrid
HUS1	O60921		hsa-miR-190b	0.461983	13	Very High	BCmicrO|CoMeTa|DIANA|ElMMo3|MBStar|microrna.org|MirAncesTar|miRDB|MirMAP|Mirza-G|RepTar|RNAhybrid|TargetRank
SLC35A3	Q9Y2D2		hsa-miR-190b	0.461071	11	Very High	BCmicrO|CoMeTa|DIANA|MBStar|MirAncesTar|miRDB|MirMAP|RepTar|RNA22|RNAhybrid|TargetScan
PLD1	Q13393		hsa-miR-190b	0.460198	9	Very High	BCmicrO|CoMeTa|DIANA|MBStar|MirAncesTar|MirMAP|PACCMIT|RNAhybrid|TargetScan
ERI1	Q8IV48		hsa-miR-190b	0.45944	14	Very High	BCmicrO|DIANA|ElMMo3|MBStar|microrna.org|MirAncesTar|miRDB|MirMAP|Mirza-G|MultiMiTar|RepTar|RNAhybrid|TargetRank|TargetSpy
2020-03-01	Q8TCQ1		hsa-miR-190b	0.457925	11	Very High	BCmicrO|CoMeTa|DIANA|ElMMo3|MBStar|MirAncesTar|miRDB|MirMAP|Mirza-G|RNAhybrid|TargetScan
GCLC	P48506		hsa-miR-190b	0.457906	13	Very High	BCmicrO|DIANA|ElMMo3|MBStar|microrna.org|MirAncesTar|miRDB|MirMAP|MirTar|Mirza-G|PACCMIT|RNAhybrid|TargetSpy
STS	P08842		hsa-miR-190b	0.457855	14	Very High	BCmicrO|CoMeTa|DIANA|ElMMo3|MBStar|microrna.org|MirAncesTar|miRDB|MirMAP|MirTar|Mirza-G|RepTar|TargetRank|TargetSpy
ZKSCAN8	Q15776		hsa-miR-190b	0.457785	15	Very High	BCmicrO|CoMeTa|DIANA|ElMMo3|MBStar|microrna.org|MirAncesTar|miRDB|MirMAP|MirSNP|Mirza-G|RepTar|RNAhybrid|TargetRank|TargetSpy
MMP8	P22894		hsa-miR-190b	0.457632	14	Very High	BCmicrO|BiTargeting|DIANA|ElMMo3|microrna.org|MirAncesTar|mirbase|miRDB|MirMAP|Mirza-G|RepTar|RNAhybrid|TargetRank|TargetSpy
VCPKMT	Q9H867		hsa-miR-190b	0.457623	14	Very High	BCmicrO|DIANA|ElMMo3|microrna.org|MirAncesTar|miRDB|MirMAP|MirSNP|MirTar|Mirza-G|RepTar|RNAhybrid|TargetRank|TargetSpy
MKL2	Q9ULH7		hsa-miR-190b	0.454851	12	Very High	BCmicrO|CoMeTa|DIANA|ElMMo3|MBStar|MirAncesTar|MirMAP|Mirza-G|RepTar|RNAhybrid|TargetScan|TargetSpy
OVOL1	O14753		hsa-miR-190b	0.454424	13	Very High	BCmicrO|CoMeTa|DIANA|ElMMo3|MBStar|microrna.org|MirAncesTar|miRDB|MirMAP|Mirza-G|RepTar|RNAhybrid|TargetScan
CLEC12B	Q2HXU8		hsa-miR-190b	0.452654	14	Very High	BCmicrO|DIANA|ElMMo3|MBStar|microrna.org|MirAncesTar|miRDB|MirMAP|MirTar|Mirza-G|RepTar|RNAhybrid|TargetRank|TargetSpy
IREB2	P48200		hsa-miR-190b	0.452415	15	Very High	BCmicrO|DIANA|ElMMo3|MBStar|microrna.org|MirAncesTar|miRDB|MirMAP|MirSNP|Mirza-G|MultiMiTar|RepTar|RNAhybrid|TargetRank|TargetSpy
BCAT1	P54687		hsa-miR-190b	0.45241	13	Very High	BCmicrO|CoMeTa|DIANA|ElMMo3|MBStar|microrna.org|MirAncesTar|miRDB|MirMAP|RepTar|RNAhybrid|TargetRank|TargetSpy
IPO8	O15397		hsa-miR-190b	0.451438	15	Very High	BCmicrO|CoMeTa|DIANA|ElMMo3|MBStar|microrna.org|MirAncesTar|miRDB|MirMAP|MirSNP|Mirza-G|MultiMiTar|RepTar|RNAhybrid|TargetSpy
SETBP1	Q9Y6X0		hsa-miR-190b	0.451239	11	Very High	BCmicrO|Cupid|DIANA|ElMMo3|MBStar|microrna.org|MirAncesTar|MirMAP|Mirza-G|RepTar|TargetScan
MOB1B	Q7L9L4		hsa-miR-190b	0.451228	13	Very High	BCmicrO|DIANA|ElMMo3|MBStar|microrna.org|MirAncesTar|miRDB|MirMAP|MirTar|Mirza-G|RepTar|RNAhybrid|TargetRank
DIAPH3	Q9NSV4		hsa-miR-190b	0.450476	13	Very High	BCmicrO|CoMeTa|DIANA|ElMMo3|MBStar|microrna.org|MirAncesTar|miRDB|MirMAP|Mirza-G|RepTar|RNAhybrid|TargetRank
SMAD4	Q13485		hsa-miR-190b	0.449808	12	Very High	BCmicrO|CoMeTa|Cupid|DIANA|ElMMo3|MBStar|MirAncesTar|MirMAP|Mirza-G|MultiMiTar|RepTar|RNAhybrid
ZMYND11	Q15326		hsa-miR-190b	0.449725	14	Very High	BCmicrO|CoMeTa|DIANA|ElMMo3|MBStar|microrna.org|MirAncesTar|miRDB|MirMAP|MirSNP|Mirza-G|RepTar|RNAhybrid|TargetRank
SETD7	Q8WTS6		hsa-miR-190b	0.449602	15	Very High	BCmicrO|BiTargeting|DIANA|ElMMo3|MBStar|microrna.org|MirAncesTar|miRDB|MirMAP|MirSNP|Mirza-G|MultiMiTar|RepTar|RNAhybrid|TargetRank
BBS4	Q96RK4		hsa-miR-190b	0.448804	11	Very High	BCmicrO|ElMMo3|microrna.org|MirAncesTar|miRDB|MirMAP|MirTar|Mirza-G|RNAhybrid|TargetRank|TargetSpy
MED13	Q9UHV7		hsa-miR-190b	0.448435	12	Very High	BCmicrO|CoMeTa|Cupid|DIANA|ElMMo3|MBStar|MirAncesTar|MirMAP|Mirza-G|MultiMiTar|RepTar|RNAhybrid
TEX15	Q9BXT5		hsa-miR-190b	0.447658	12	Very High	BCmicrO|CoMeTa|DIANA|ElMMo3|MBStar|microrna.org|MirAncesTar|MirMAP|MirTar|Mirza-G|RNAhybrid|TargetSpy
APAF1	O14727		hsa-miR-190b	0.447465	14	Very High	BCmicrO|CoMeTa|DIANA|ElMMo3|MBStar|microrna.org|MirAncesTar|miRDB|MirMAP|Mirza-G|RepTar|RNAhybrid|TargetRank|TargetSpy
KLHL42	Q9P2K6		hsa-miR-190b	0.4474	14	Very High	BCmicrO|DIANA|ElMMo3|MBStar|microrna.org|MirAncesTar|miRDB|MirMAP|MirTar|Mirza-G|RepTar|RNAhybrid|TargetRank|TargetSpy
ALPK3	Q96L96		hsa-miR-190b	0.446478	13	Very High	BCmicrO|CoMeTa|DIANA|ElMMo3|MBStar|microrna.org|MirAncesTar|miRDB|MirMAP|MirSNP|MirTar|RepTar|TargetRank
B4GALT6	Q9UBX8		hsa-miR-190b	0.446244	15	Very High	BCmicrO|CoMeTa|DIANA|ElMMo3|MBStar|microrna.org|MirAncesTar|mirbase|miRDB|MirMAP|Mirza-G|MultiMiTar|RepTar|RNAhybrid|TargetSpy
RSPO1	Q2MKA7		hsa-miR-190b	0.446237	16	Very High	BCmicrO|BiTargeting|DIANA|ElMMo3|MBStar|microrna.org|MirAncesTar|miRDB|MirMAP|MirTar|Mirza-G|RepTar|RNA22|RNAhybrid|TargetRank|TargetSpy
ZDHHC15	Q96MV8		hsa-miR-190b	0.446168	14	Very High	BCmicrO|BiTargeting|DIANA|ElMMo3|MBStar|microrna.org|MirAncesTar|mirbase|miRDB|MirMAP|MirSNP|MirTar|Mirza-G|RepTar
C5orf15	Q8NC54		hsa-miR-190b	0.444353	13	Very High	BCmicrO|CoMeTa|DIANA|ElMMo3|MBStar|microrna.org|MirAncesTar|miRDB|MirMAP|Mirza-G|RepTar|RNAhybrid|TargetSpy
HPGD	P15428		hsa-miR-190b	0.443586	15	Very High	BCmicrO|BiTargeting|CoMeTa|DIANA|ElMMo3|MBStar|microrna.org|MirAncesTar|mirbase|miRDB|MirMAP|Mirza-G|RepTar|RNAhybrid|TargetRank
TRIO	O75962		hsa-miR-190b	0.443329	11	Very High	BCmicrO|Cupid|ElMMo3|MBStar|microrna.org|MirAncesTar|MirMAP|Mirza-G|RNAhybrid|TargetScan|TargetSpy
ZSCAN31	Q96LW9		hsa-miR-190b	0.442558	13	Very High	BCmicrO|DIANA|ElMMo3|MBStar|microrna.org|MirAncesTar|mirbase|miRDB|MirMAP|MirTar|RepTar|RNAhybrid|TargetSpy
FGD6	Q6ZV73		hsa-miR-190b	0.441445	14	Very High	BCmicrO|DIANA|ElMMo3|MBStar|microrna.org|MirAncesTar|miRDB|MirMAP|MirTar|Mirza-G|RepTar|RNAhybrid|TargetRank|TargetSpy
SUSD4	Q5VX71		hsa-miR-190b	0.440562	13	Very High	BCmicrO|DIANA|ElMMo3|MBStar|microrna.org|MirAncesTar|miRDB|MirMAP|MirTar|Mirza-G|RepTar|RNAhybrid|TargetRank
TRIM10	Q9UDY6		hsa-miR-190b	0.439664	13	Very High	BCmicrO|CoMeTa|DIANA|ElMMo3|MBStar|microrna.org|MirAncesTar|miRDB|MirMAP|MirTar|Mirza-G|RepTar|RNAhybrid
FAM122A	Q96E09		hsa-miR-190b	0.439365	14	Very High	BCmicrO|DIANA|ElMMo3|MBStar|microrna.org|MirAncesTar|miRDB|MirMAP|MirSNP|MirTar|Mirza-G|RepTar|TargetRank|TargetSpy
DCAF8	Q5TAQ9		hsa-miR-190b	0.438445	14	Very High	BCmicrO|CoMeTa|Cupid|DIANA|ElMMo3|microrna.org|MirAncesTar|miRDB|MirMAP|Mirza-G|RepTar|RNA22|RNAhybrid|TargetSpy
RNF138	Q8WVD3		hsa-miR-190b	0.437558	12	Very High	BCmicrO|CoMeTa|DIANA|ElMMo3|MBStar|microrna.org|MirAncesTar|miRDB|MirMAP|Mirza-G|RepTar|TargetRank
C21orf91	Q9NYK6		hsa-miR-190b	0.437419	13	Very High	BCmicrO|Cupid|DIANA|ElMMo3|MBStar|MirAncesTar|MirMAP|Mirza-G|MultiMiTar|RepTar|RNAhybrid|TargetRank|TargetSpy
KIAA1841	Q6NSI8		hsa-miR-190b	0.436955	13	Very High	BCmicrO|DIANA|ElMMo3|MBStar|microrna.org|MirAncesTar|MirMAP|MirSNP|MirTar|Mirza-G|RepTar|RNAhybrid|TargetRank
RPL37	P61927		hsa-miR-190b	0.436717	14	Very High	BCmicrO|DIANA|ElMMo3|MBStar|microrna.org|MirAncesTar|miRDB|MirMAP|MirSNP|MirTar|Mirza-G|RNAhybrid|TargetRank|TargetSpy
MEGF9	Q9H1U4		hsa-miR-190b	0.435751	13	Very High	BCmicrO|CoMeTa|DIANA|ElMMo3|MBStar|microrna.org|MirAncesTar|miRDB|MirMAP|MirSNP|Mirza-G|RepTar|TargetSpy
PI15	O43692		hsa-miR-190b	0.435707	14	Very High	BCmicrO|CoMeTa|DIANA|ElMMo3|MBStar|microrna.org|MirAncesTar|miRDB|MirMAP|Mirza-G|RepTar|RNAhybrid|TargetRank|TargetSpy
NFKBIZ	Q9BYH8		hsa-miR-190b	0.435496	14	Very High	BCmicrO|BiTargeting|DIANA|ElMMo3|MBStar|microrna.org|MirAncesTar|mirbase|miRDB|MirMAP|Mirza-G|RepTar|RNAhybrid|TargetRank
PTCH1	Q13635		hsa-miR-190b	0.434667	11	Very High	BCmicrO|CoMeTa|Cupid|DIANA|ElMMo3|MBStar|MirAncesTar|MirMAP|Mirza-G|RNAhybrid|TargetScan
PFDN4	Q9NQP4		hsa-miR-190b	0.434447	12	Very High	BCmicrO|CoMeTa|DIANA|ElMMo3|MBStar|microrna.org|MirAncesTar|miRDB|MirMAP|MirTar|Mirza-G|RNAhybrid
PLEKHF2	Q9H8W4		hsa-miR-190b	0.434128	13	Very High	BCmicrO|CoMeTa|DIANA|ElMMo3|MBStar|microrna.org|miRDB|MirMAP|MirSNP|Mirza-G|RepTar|RNAhybrid|TargetSpy
ZBTB11	O95625		hsa-miR-190b	0.432834	13	Very High	BCmicrO|DIANA|ElMMo3|MBStar|microrna.org|MirAncesTar|miRDB|MirMAP|MirTar|Mirza-G|RNAhybrid|TargetRank|TargetSpy
SLC26A3	P40879		hsa-miR-190b	0.432673	13	Very High	BCmicrO|CoMeTa|DIANA|ElMMo3|MBStar|microrna.org|MirAncesTar|mirbase|miRDB|MirMAP|Mirza-G|RepTar|RNAhybrid
2020-09-11	Q9NVA2		hsa-miR-190b	0.432412	12	Very High	BCmicrO|CoMeTa|DIANA|ElMMo3|MBStar|MirAncesTar|MirMAP|Mirza-G|MultiMiTar|RepTar|RNAhybrid|TargetRank
PHF20	Q9BVI0		hsa-miR-190b	0.432063	13	Very High	BCmicrO|CoMeTa|DIANA|ElMMo3|MBStar|microrna.org|MirAncesTar|miRDB|MirMAP|MirSNP|Mirza-G|RepTar|TargetSpy
CDH6	P55285		hsa-miR-190b	0.431733	14	Very High	BCmicrO|CoMeTa|DIANA|ElMMo3|MBStar|microrna.org|MirAncesTar|MirMAP|Mirza-G|MultiMiTar|RepTar|RNAhybrid|TargetRank|TargetSpy
EPHA5	P54756		hsa-miR-190b	0.431175	14	Very High	BCmicrO|BiTargeting|CoMeTa|DIANA|ElMMo3|MBStar|microrna.org|MirAncesTar|miRDB|MirMAP|MirSNP|MirTar|Mirza-G|RNAhybrid
ZBTB41	Q5SVQ8		hsa-miR-190b	0.430638	12	Very High	BCmicrO|ElMMo3|MBStar|microrna.org|MirAncesTar|miRDB|MirTar|Mirza-G|RepTar|RNA22|TargetRank|TargetSpy
PRKRA	O75569		hsa-miR-190b	0.430507	13	Very High	BCmicrO|ElMMo3|MBStar|microrna.org|MirAncesTar|miRDB|MirMAP|MirTar|Mirza-G|RepTar|RNAhybrid|TargetRank|TargetSpy
DNAJB14	Q8TBM8		hsa-miR-190b	0.430321	12	Very High	BCmicrO|CoMeTa|DIANA|ElMMo3|microrna.org|MirAncesTar|miRDB|MirMAP|MirTar|Mirza-G|RepTar|RNAhybrid
RGS21	Q2M5E4		hsa-miR-190b	0.430302	13	Very High	BCmicrO|DIANA|ElMMo3|MBStar|microrna.org|MirAncesTar|miRDB|MirMAP|Mirza-G|RepTar|RNAhybrid|TargetRank|TargetSpy
AICDA	Q9GZX7		hsa-miR-190b	0.430196	14	Very High	BCmicrO|CoMeTa|DIANA|ElMMo3|MBStar|microrna.org|MirAncesTar|miRDB|MirMAP|MirTar|Mirza-G|RepTar|RNAhybrid|TargetSpy
DAB2IP	Q5VWQ8		hsa-miR-190b	0.430159	13	Very High	BCmicrO|BiTargeting|Cupid|DIANA|ElMMo3|microrna.org|MirAncesTar|mirbase|MirMAP|Mirza-G|PACCMIT|RepTar|RNAhybrid
TXK	P42681		hsa-miR-190b	0.429911	12	Very High	BCmicrO|DIANA|ElMMo3|microrna.org|MirAncesTar|miRDB|MirMAP|Mirza-G|RepTar|RNAhybrid|TargetScan|TargetSpy
PLPPR5	Q32ZL2		hsa-miR-190b	0.429831	13	Very High	BCmicrO|Cupid|DIANA|ElMMo3|MBStar|microrna.org|MirAncesTar|miRDB|MirMAP|Mirza-G|MultiMiTar|RepTar|TargetSpy
HNRNPU	Q00839		hsa-miR-190b	0.429695	14	Very High	BCmicrO|CoMeTa|DIANA|ElMMo3|MBStar|microrna.org|MirAncesTar|miRDB|MirMAP|Mirza-G|MultiMiTar|RepTar|RNAhybrid|TargetSpy
KIF5C	O60282		hsa-miR-190b	0.428696	14	Very High	BCmicrO|BiTargeting|CoMeTa|DIANA|ElMMo3|MBStar|microrna.org|MirAncesTar|miRDB|MirMAP|Mirza-G|RepTar|RNAhybrid|TargetRank
SOCS6	O14544		hsa-miR-190b	0.42846	13	Very High	BCmicrO|CoMeTa|DIANA|ElMMo3|MBStar|microrna.org|miRDB|MirMAP|MirSNP|Mirza-G|RepTar|RNAhybrid|TargetRank
SGCD	Q92629		hsa-miR-190b	0.427797	14	Very High	BCmicrO|CoMeTa|DIANA|ElMMo3|MBStar|MirAncesTar|miRDB|MirMAP|MirSNP|MultiMiTar|RepTar|RNAhybrid|TargetRank|TargetSpy
GDF11	O95390		hsa-miR-190b	0.42729	10	Very High	BCmicrO|Cupid|ElMMo3|microrna.org|MirAncesTar|MirSNP|MirTar|Mirza-G|RNAhybrid|TargetScan
GPR137C	Q8N3F9		hsa-miR-190b	0.427122	14	Very High	BCmicrO|DIANA|ElMMo3|MBStar|microrna.org|MirAncesTar|miRDB|MirMAP|MirTar|Mirza-G|RepTar|RNAhybrid|TargetRank|TargetSpy
CRISPLD2	Q9H0B8		hsa-miR-190b	0.427025	14	Very High	BCmicrO|CoMeTa|DIANA|ElMMo3|MBStar|microrna.org|MirAncesTar|miRDB|MirMAP|MirTar|Mirza-G|RepTar|RNAhybrid|TargetSpy
TBC1D9	Q6ZT07		hsa-miR-190b	0.425538	13	Very High	BCmicrO|CoMeTa|Cupid|ElMMo3|MBStar|microrna.org|MirAncesTar|miRDB|MirMAP|MirSNP|Mirza-G|RNAhybrid|TargetSpy
KCNMB2	Q9Y691		hsa-miR-190b	0.424188	13	Very High	BCmicrO|CoMeTa|Cupid|DIANA|ElMMo3|MBStar|microrna.org|MirAncesTar|MirMAP|Mirza-G|RepTar|RNAhybrid|TargetSpy
ORC4	O43929		hsa-miR-190b	0.424141	12	Very High	BCmicrO|DIANA|ElMMo3|MBStar|microrna.org|MirAncesTar|miRDB|MirMAP|MirTar|Mirza-G|TargetRank|TargetSpy
CNGB3	Q9NQW8		hsa-miR-190b	0.42355	13	Very High	BCmicrO|CoMeTa|DIANA|ElMMo3|MBStar|microrna.org|MirAncesTar|miRDB|MirMAP|MirSNP|RepTar|RNAhybrid|TargetScan
RLIM	Q9NVW2		hsa-miR-190b	0.423446	11	Very High	BCmicrO|DIANA|ElMMo3|MBStar|MirAncesTar|miRDB|MirMAP|MirTar|RepTar|RNAhybrid|TargetScan
ITGB8	P26012		hsa-miR-190b	0.422522	12	Very High	BCmicrO|CoMeTa|ElMMo3|MBStar|microrna.org|MirAncesTar|miRDB|Mirza-G|MultiMiTar|RepTar|RNAhybrid|TargetRank
ARHGEF12	Q9NZN5		hsa-miR-190b	0.421972	13	Very High	BCmicrO|DIANA|ElMMo3|MBStar|microrna.org|MirAncesTar|miRDB|MirMAP|MirTar|Mirza-G|RepTar|RNAhybrid|TargetRank
C11orf57	Q6ZUT1		hsa-miR-190b	0.421659	13	Very High	BCmicrO|CoMeTa|DIANA|ElMMo3|microrna.org|MirAncesTar|miRDB|MirMAP|Mirza-G|RepTar|RNAhybrid|TargetRank|TargetSpy
NOTCH2NL	Q7Z3S9		hsa-miR-190b	0.421093	13	Very High	BCmicrO|CoMeTa|DIANA|ElMMo3|MBStar|microrna.org|MirAncesTar|miRDB|MirMAP|Mirza-G|RNAhybrid|TargetRank|TargetSpy
PHIP	Q8WWQ0		hsa-miR-190b	0.420459	9	Very High	BCmicrO|Cupid|ElMMo3|MBStar|microrna.org|MirAncesTar|miRDB|Mirza-G|TargetScan
CPNE8	Q86YQ8		hsa-miR-190b	0.420225	12	Very High	BCmicrO|Cupid|DIANA|ElMMo3|MBStar|microrna.org|MirAncesTar|miRDB|MirMAP|Mirza-G|RepTar|RNAhybrid
NCK1	P16333		hsa-miR-190b	0.420162	12	Very High	BCmicrO|CoMeTa|DIANA|ElMMo3|MBStar|microrna.org|MirAncesTar|mirbase|MirMAP|Mirza-G|RepTar|RNAhybrid
JCAD	Q9P266		hsa-miR-190b	0.420064	14	Very High	BCmicrO|BiTargeting|CoMeTa|DIANA|ElMMo3|MBStar|microrna.org|MirAncesTar|miRDB|MirMAP|MirSNP|Mirza-G|RepTar|TargetRank
CPEB3	Q8NE35		hsa-miR-190b	0.41869	10	Very High	BCmicrO|CoMeTa|Cupid|DIANA|MBStar|microrna.org|MirAncesTar|MirMAP|MultiMiTar|RepTar
CLGN	O14967		hsa-miR-190b	0.417379	13	Very High	BCmicrO|CoMeTa|DIANA|ElMMo3|MBStar|microrna.org|MirAncesTar|miRDB|MirMAP|Mirza-G|RNAhybrid|TargetRank|TargetSpy
PTER	Q96BW5		hsa-miR-190b	0.416545	13	Very High	BCmicrO|DIANA|ElMMo3|MBStar|microrna.org|MirAncesTar|miRDB|MirMAP|MirSNP|Mirza-G|RepTar|TargetRank|TargetSpy
MPZL2	O60487		hsa-miR-190b	0.416529	13	Very High	BCmicrO|DIANA|ElMMo3|MBStar|microrna.org|MirAncesTar|miRDB|MirMAP|MirTar|Mirza-G|RepTar|RNAhybrid|TargetRank
CCL22	O00626		hsa-miR-190b	0.41608	11	Very High	BCmicrO|CoMeTa|DIANA|ElMMo3|MBStar|microrna.org|MirAncesTar|miRDB|MirMAP|RepTar|TargetRank
NR3C1	P04150		hsa-miR-190b	0.415098	11	Very High	BCmicrO|CoMeTa|MBStar|microrna.org|MirAncesTar|MirSNP|MirTar|Mirza-G|MultiMiTar|RepTar|RNAhybrid
RIC1	Q4ADV7		hsa-miR-190b	0.414989	12	Very High	BCmicrO|DIANA|ElMMo3|MBStar|microrna.org|MirAncesTar|miRDB|MirMAP|Mirza-G|PACCMIT|RNAhybrid|TargetScan
LEPR	P48357		hsa-miR-190b	0.414697	13	Very High	BCmicrO|CoMeTa|DIANA|ElMMo3|MBStar|microrna.org|MirAncesTar|miRDB|MirMAP|Mirza-G|RepTar|RNA22|RNAhybrid
SPC25	Q9HBM1		hsa-miR-190b	0.414618	11	Very High	BCmicrO|DIANA|ElMMo3|MBStar|microrna.org|MirAncesTar|miRDB|MirMAP|MirTar|RNAhybrid|TargetRank
GPR26	Q8NDV2		hsa-miR-190b	0.414523	11	Very High	BCmicrO|ElMMo3|MBStar|MirAncesTar|miRDB|MirMAP|MirTar|Mirza-G|RepTar|TargetScan|TargetSpy
RIMKLB	Q9ULI2		hsa-miR-190b	0.414508	14	Very High	BCmicrO|DIANA|ElMMo3|MBStar|microrna.org|MirAncesTar|miRDB|MirMAP|Mirza-G|MultiMiTar|RepTar|RNAhybrid|TargetRank|TargetSpy
FNDC1	Q4ZHG4		hsa-miR-190b	0.413977	13	Very High	BCmicrO|DIANA|ElMMo3|MBStar|microrna.org|MirAncesTar|miRDB|MirMAP|Mirza-G|RepTar|RNAhybrid|TargetRank|TargetSpy
PCLO	Q9Y6V0		hsa-miR-190b	0.413944	12	Very High	BCmicrO|Cupid|ElMMo3|MBStar|microrna.org|MirAncesTar|miRDB|MirTar|Mirza-G|RepTar|RNAhybrid|TargetSpy
HBS1L	Q9Y450		hsa-miR-190b	0.4137	14	Very High	BCmicrO|DIANA|ElMMo3|MBStar|microrna.org|MirAncesTar|miRDB|MirMAP|MirTar|Mirza-G|RepTar|RNAhybrid|TargetRank|TargetSpy
BCLAF3			hsa-miR-190b	0.412742	12	Very High	BCmicrO|Cupid|DIANA|ElMMo3|MBStar|microrna.org|MirAncesTar|MirMAP|Mirza-G|RepTar|RNAhybrid|TargetRank
GREM1	O60565		hsa-miR-190b	0.412383	15	Very High	BCmicrO|BiTargeting|DIANA|ElMMo3|MBStar|microrna.org|MirAncesTar|miRDB|MirMAP|MirSNP|Mirza-G|RepTar|RNAhybrid|TargetRank|TargetSpy
CYP24A1	Q07973		hsa-miR-190b	0.411488	12	Very High	BCmicrO|DIANA|ElMMo3|MBStar|microrna.org|MirAncesTar|miRDB|MirMAP|Mirza-G|RNAhybrid|TargetRank|TargetSpy
SBNO1	A3KN83		hsa-miR-190b	0.410617	8	Very High	Cupid|DIANA|ElMMo3|MBStar|MirAncesTar|MirMAP|Mirza-G|TargetScan
ITSN1	Q15811		hsa-miR-190b	0.410466	10	Very High	BCmicrO|Cupid|ElMMo3|MBStar|MirAncesTar|MirMAP|Mirza-G|RepTar|RNAhybrid|TargetScan
KDM5A	P29375		hsa-miR-190b	0.410342	13	Very High	BCmicrO|CoMeTa|DIANA|ElMMo3|MBStar|microrna.org|MirAncesTar|miRDB|MirMAP|Mirza-G|MultiMiTar|RepTar|TargetSpy
FLRT3	Q9NZU0		hsa-miR-190b	0.410185	12	Very High	BCmicrO|CoMeTa|DIANA|ElMMo3|MBStar|microrna.org|MirAncesTar|MirMAP|Mirza-G|RepTar|TargetRank|TargetSpy
TRAPPC13	A5PLN9		hsa-miR-190b	0.409974	14	Very High	BCmicrO|DIANA|ElMMo3|MBStar|microrna.org|MirAncesTar|miRDB|MirMAP|MirSNP|Mirza-G|RepTar|RNAhybrid|TargetRank|TargetSpy
FBXO22	Q8NEZ5		hsa-miR-190b	0.409954	10	Very High	BCmicrO|ElMMo3|MBStar|microrna.org|MirAncesTar|MirTar|Mirza-G|RNAhybrid|TargetRank|TargetSpy
KIF20B	Q96Q89		hsa-miR-190b	0.409488	13	Very High	BCmicrO|CoMeTa|DIANA|ElMMo3|MBStar|microrna.org|MirAncesTar|miRDB|MirMAP|Mirza-G|RepTar|RNAhybrid|TargetSpy
TNFRSF19	Q9NS68		hsa-miR-190b	0.409122	14	Very High	BCmicrO|DIANA|ElMMo3|MBStar|microrna.org|MirAncesTar|miRDB|MirMAP|MirSNP|Mirza-G|RepTar|RNAhybrid|TargetRank|TargetSpy
SSR1	P43307		hsa-miR-190b	0.408964	13	Very High	BCmicrO|CoMeTa|DIANA|ElMMo3|MBStar|MirAncesTar|miRDB|MirMAP|Mirza-G|RepTar|RNAhybrid|TargetRank|TargetSpy
MAP3K2	Q9Y2U5		hsa-miR-190b	0.408789	12	Very High	BCmicrO|CoMeTa|DIANA|ElMMo3|MBStar|microrna.org|MirAncesTar|MirMAP|Mirza-G|RepTar|RNAhybrid|TargetRank
SEC14L1	Q92503		hsa-miR-190b	0.408637	11	Very High	BCmicrO|Cupid|DIANA|ElMMo3|MBStar|microrna.org|MirAncesTar|MirMAP|Mirza-G|RepTar|RNAhybrid
KCNIP4	Q6PIL6		hsa-miR-190b	0.408479	13	Very High	BCmicrO|CoMeTa|DIANA|ElMMo3|MBStar|microrna.org|MirAncesTar|miRDB|MirMAP|Mirza-G|RNAhybrid|TargetRank|TargetSpy
EPHB2	P29323		hsa-miR-190b	0.408076	11	Very High	BCmicrO|DIANA|ElMMo3|microrna.org|MirAncesTar|miRDB|MirMAP|RepTar|RNAhybrid|TargetRank|TargetScan
CHMP7	Q8WUX9		hsa-miR-190b	0.408042	13	Very High	BCmicrO|CoMeTa|DIANA|ElMMo3|microrna.org|MirAncesTar|miRDB|MirMAP|MirTar|Mirza-G|RepTar|RNAhybrid|TargetSpy
GUCY1B3	Q02153		hsa-miR-190b	0.406904	11	Very High	BCmicrO|DIANA|ElMMo3|MBStar|microrna.org|MirAncesTar|miRDB|MirMAP|MirTar|Mirza-G|RNAhybrid
GCC1	Q96CN9		hsa-miR-190b	0.406657	12	Very High	BCmicrO|CoMeTa|DIANA|ElMMo3|MBStar|microrna.org|MirAncesTar|miRDB|MirMAP|Mirza-G|RepTar|TargetRank
TMEM56	Q96MV1		hsa-miR-190b	0.40583	12	Very High	BCmicrO|DIANA|ElMMo3|MBStar|microrna.org|MirAncesTar|miRDB|MirMAP|Mirza-G|RepTar|RNA22|TargetScan
HS2ST1	Q7LGA3		hsa-miR-190b	0.405562	14	Very High	BCmicrO|CoMeTa|DIANA|ElMMo3|MBStar|MirAncesTar|miRDB|MirMAP|MirSNP|Mirza-G|MultiMiTar|RepTar|RNA22|RNAhybrid
POF1B	Q8WVV4		hsa-miR-190b	0.405459	13	Very High	BCmicrO|DIANA|ElMMo3|MBStar|microrna.org|MirAncesTar|miRDB|MirMAP|MirTar|Mirza-G|RepTar|RNAhybrid|TargetRank
PCDHB13	Q9Y5F0		hsa-miR-190b	0.405331	12	Very High	BCmicrO|DIANA|ElMMo3|MBStar|microrna.org|MirAncesTar|mirbase|miRDB|MirMAP|Mirza-G|RepTar|TargetRank
ANXA7	P20073		hsa-miR-190b	0.405005	11	Very High	BCmicrO|DIANA|ElMMo3|MBStar|microrna.org|MirAncesTar|MirMAP|Mirza-G|RepTar|RNAhybrid|TargetScan
PJA2	O43164		hsa-miR-190b	0.404481	11	Very High	BCmicrO|Cupid|DIANA|ElMMo3|MBStar|microrna.org|MirAncesTar|MirMAP|Mirza-G|MultiMiTar|TargetRank
CAPS2	Q9BXY5		hsa-miR-190b	0.40448	12	Very High	BCmicrO|BiTargeting|DIANA|ElMMo3|microrna.org|MirAncesTar|mirbase|MirMAP|Mirza-G|RepTar|RNAhybrid|TargetRank
HECW1	Q76N89		hsa-miR-190b	0.40401	12	Very High	BCmicrO|BiTargeting|CoMeTa|DIANA|ElMMo3|microrna.org|MirAncesTar|miRDB|MirMAP|Mirza-G|RepTar|RNAhybrid
NFIA	Q12857		hsa-miR-190b	0.403898	10	Very High	BCmicrO|Cupid|DIANA|ElMMo3|MBStar|MirAncesTar|MirMAP|Mirza-G|RNAhybrid|TargetScan
CDNF	Q49AH0		hsa-miR-190b	0.403457	13	Very High	BCmicrO|DIANA|ElMMo3|MBStar|microrna.org|MirAncesTar|miRDB|MirMAP|Mirza-G|RepTar|RNAhybrid|TargetRank|TargetSpy
NFAT5	O94916		hsa-miR-190b	0.403366	14	Very High	BCmicrO|CoMeTa|DIANA|ElMMo3|MBStar|MirAncesTar|miRDB|MirMAP|MirSNP|Mirza-G|RepTar|RNAhybrid|TargetRank|TargetSpy
ACTG1	P63261		hsa-miR-190b	0.403111	14	Very High	BCmicrO|DIANA|ElMMo3|microrna.org|MirAncesTar|mirbase|miRDB|MirMAP|MirSNP|MirTar|Mirza-G|RepTar|RNAhybrid|TargetSpy
UBA6	A0AVT1		hsa-miR-190b	0.402656	14	Very High	BCmicrO|CoMeTa|DIANA|ElMMo3|MBStar|microrna.org|MirAncesTar|miRDB|MirMAP|Mirza-G|MultiMiTar|RepTar|RNAhybrid|TargetSpy
EMC2	Q15006		hsa-miR-190b	0.402239	11	Very High	BCmicrO|DIANA|ElMMo3|MBStar|microrna.org|MirAncesTar|MirMAP|Mirza-G|RepTar|RNAhybrid|TargetScan
EID1	Q9Y6B2		hsa-miR-190b	0.399325	13	Very High	BCmicrO|CoMeTa|DIANA|ElMMo3|MBStar|microrna.org|MirAncesTar|miRDB|MirMAP|Mirza-G|RepTar|RNAhybrid|TargetSpy
CACNB4	O00305		hsa-miR-190b	0.398988	11	Very High	BCmicrO|DIANA|ElMMo3|MBStar|microrna.org|MirAncesTar|miRDB|MirMAP|MirTar|RNAhybrid|TargetScan
EYS	Q5T1H1		hsa-miR-190b	0.398325	13	Very High	BCmicrO|BiTargeting|DIANA|ElMMo3|MBStar|microrna.org|MirAncesTar|miRDB|MirMAP|MirTar|Mirza-G|RepTar|RNAhybrid
ZBTB1	Q9Y2K1		hsa-miR-190b	0.398094	12	Very High	BCmicrO|Cupid|ElMMo3|MBStar|microrna.org|MirAncesTar|MirMAP|MirTar|Mirza-G|RepTar|RNAhybrid|TargetSpy
UNC119B	A6NIH7		hsa-miR-190b	0.397415	11	Very High	BCmicrO|CoMeTa|DIANA|ElMMo3|microrna.org|MirAncesTar|miRDB|MirMAP|Mirza-G|RepTar|TargetRank
ENTPD1	P49961		hsa-miR-190b	0.397077	12	Very High	BCmicrO|DIANA|ElMMo3|MBStar|MirAncesTar|miRDB|MirMAP|MirTar|Mirza-G|RepTar|RNAhybrid|TargetRank
NUMB	P49757		hsa-miR-190b	0.397029	11	Very High	BCmicrO|BiTargeting|CoMeTa|ElMMo3|MBStar|microrna.org|MirAncesTar|mirbase|MirMAP|RepTar|RNAhybrid
RIPOR2	Q9Y4F9		hsa-miR-190b	0.396388	13	Very High	BCmicrO|CoMeTa|DIANA|ElMMo3|MBStar|microrna.org|MirAncesTar|miRDB|MirMAP|MirSNP|Mirza-G|RNAhybrid|TargetSpy
FGL1	Q08830		hsa-miR-190b	0.395876	13	Very High	BCmicrO|CoMeTa|DIANA|ElMMo3|MBStar|microrna.org|MirAncesTar|mirbase|miRDB|MirMAP|Mirza-G|RepTar|RNAhybrid
PDE7B	Q9NP56		hsa-miR-190b	0.395765	13	Very High	BCmicrO|CoMeTa|DIANA|ElMMo3|MBStar|microrna.org|MirAncesTar|miRDB|MirMAP|MirTar|Mirza-G|RNAhybrid|TargetRank
EDIL3	O43854		hsa-miR-190b	0.395714	11	Very High	BCmicrO|DIANA|ElMMo3|MBStar|microrna.org|MirAncesTar|miRDB|MirMAP|MirTar|Mirza-G|TargetRank
TRMT5	Q32P41		hsa-miR-190b	0.395091	12	Very High	BCmicrO|DIANA|ElMMo3|MBStar|microrna.org|MirAncesTar|miRDB|MirMAP|MirSNP|Mirza-G|RepTar|TargetRank
GNG2	P59768		hsa-miR-190b	0.395015	12	Very High	BCmicrO|DIANA|ElMMo3|MBStar|microrna.org|MirAncesTar|miRDB|MirMAP|Mirza-G|RepTar|RNAhybrid|TargetRank
RGS18	Q9NS28		hsa-miR-190b	0.3944	14	Very High	BCmicrO|DIANA|ElMMo3|MBStar|microrna.org|MirAncesTar|miRDB|MirMAP|Mirza-G|RepTar|RNA22|RNAhybrid|TargetRank|TargetSpy
LRP2BP	Q9P2M1		hsa-miR-190b	0.394189	13	Very High	BCmicrO|DIANA|ElMMo3|MBStar|microrna.org|MirAncesTar|miRDB|MirMAP|Mirza-G|RepTar|RNAhybrid|TargetRank|TargetSpy
MAF	O75444		hsa-miR-190b	0.393818	11	Very High	BCmicrO|CoMeTa|ElMMo3|microrna.org|MirAncesTar|miRDB|MirMAP|RepTar|RNAhybrid|TargetRank|TargetSpy
MAP3K7CL	P57077		hsa-miR-190b	0.39357	14	Very High	BCmicrO|CoMeTa|DIANA|ElMMo3|MBStar|microrna.org|MirAncesTar|miRDB|MirMAP|MirSNP|Mirza-G|RepTar|RNAhybrid|TargetSpy
PLEKHA1	Q9HB21		hsa-miR-190b	0.393121	11	Very High	BCmicrO|CoMeTa|DIANA|ElMMo3|MBStar|microrna.org|MirAncesTar|MirMAP|Mirza-G|RepTar|RNAhybrid
CT47A1	Q5JQC4		hsa-miR-190b	0.392874	11	Very High	BCmicrO|DIANA|ElMMo3|MBStar|microrna.org|MirAncesTar|miRDB|MirMAP|Mirza-G|RNAhybrid|TargetSpy
CSRNP3	Q8WYN3		hsa-miR-190b	0.392158	13	Very High	BCmicrO|CoMeTa|DIANA|ElMMo3|MBStar|microrna.org|MirAncesTar|mirbase|miRDB|MirMAP|MirTar|RepTar|RNAhybrid
SLC7A11	Q9UPY5		hsa-miR-190b	0.391788	11	Very High	BCmicrO|CoMeTa|DIANA|ElMMo3|MBStar|MirAncesTar|miRDB|MirMAP|RepTar|RNAhybrid|TargetRank
RSBN1	Q5VWQ0		hsa-miR-190b	0.391569	11	Very High	BCmicrO|BiTargeting|CoMeTa|DIANA|MBStar|MirAncesTar|mirbase|MirMAP|MultiMiTar|RepTar|RNA22
AGPS	O00116		hsa-miR-190b	0.391225	14	Very High	BCmicrO|BiTargeting|CoMeTa|ElMMo3|MBStar|microrna.org|MirAncesTar|mirbase|miRDB|MirMAP|Mirza-G|RepTar|RNAhybrid|TargetSpy
TFEC	O14948		hsa-miR-190b	0.391149	13	Very High	BCmicrO|BiTargeting|DIANA|ElMMo3|MBStar|microrna.org|MirAncesTar|miRDB|MirMAP|Mirza-G|RepTar|RNAhybrid|TargetRank
MUC17	Q685J3		hsa-miR-190b	0.391057	10	Very High	BCmicrO|DIANA|microrna.org|MirAncesTar|miRDB|MirMAP|MirTar|Mirza-G|TargetRank|TargetSpy
IRF2BP2	Q7Z5L9		hsa-miR-190b	0.390674	9	Very High	BCmicrO|ElMMo3|MBStar|microrna.org|MirAncesTar|MirMAP|MultiMiTar|RepTar|TargetScan
VPS41	P49754		hsa-miR-190b	0.390094	14	Very High	BCmicrO|DIANA|ElMMo3|MBStar|microrna.org|MirAncesTar|miRDB|MirMAP|MirSNP|Mirza-G|RepTar|RNAhybrid|TargetRank|TargetSpy
C18orf25	Q96B23		hsa-miR-190b	0.389665	12	Very High	BCmicrO|CoMeTa|DIANA|ElMMo3|MBStar|microrna.org|MirAncesTar|miRDB|MirMAP|Mirza-G|RepTar|TargetRank
HERC3	Q15034		hsa-miR-190b	0.389447	13	Very High	BCmicrO|BiTargeting|CoMeTa|DIANA|ElMMo3|MBStar|microrna.org|MirAncesTar|miRDB|MirMAP|Mirza-G|RepTar|RNAhybrid
CCDC186	Q7Z3E2		hsa-miR-190b	0.389336	13	Very High	BCmicrO|BiTargeting|DIANA|ElMMo3|MBStar|microrna.org|MirAncesTar|MirMAP|Mirza-G|RepTar|RNAhybrid|TargetRank|TargetSpy
RP2	O75695		hsa-miR-190b	0.389311	11	Very High	BCmicrO|DIANA|ElMMo3|microrna.org|MirAncesTar|miRDB|MirMAP|Mirza-G|RepTar|TargetRank|TargetSpy
IRF8	Q02556		hsa-miR-190b	0.38928	13	Very High	BCmicrO|CoMeTa|DIANA|ElMMo3|MBStar|microrna.org|MirAncesTar|miRDB|MirMAP|MirSNP|Mirza-G|RepTar|RNAhybrid
ZNF529	Q6P280		hsa-miR-190b	0.389199	12	Very High	BCmicrO|DIANA|ElMMo3|MBStar|microrna.org|MirAncesTar|miRDB|MirMAP|Mirza-G|MultiMiTar|RNAhybrid|TargetRank
PARP14	Q460N5		hsa-miR-190b	0.389014	11	Very High	BCmicrO|ElMMo3|MBStar|microrna.org|MirAncesTar|mirbase|miRDB|MirMAP|RepTar|TargetRank|TargetSpy
ZFC3H1	O60293		hsa-miR-190b	0.38899	12	Very High	BCmicrO|Cupid|DIANA|ElMMo3|MBStar|microrna.org|MirAncesTar|MirMAP|Mirza-G|RepTar|RNAhybrid|TargetSpy
ST6GAL2	Q96JF0		hsa-miR-190b	0.388635	11	Very High	BCmicrO|DIANA|ElMMo3|MBStar|microrna.org|MirAncesTar|miRDB|MirMAP|Mirza-G|RNAhybrid|TargetScan
NCAM1	P13591		hsa-miR-190b	0.388622	11	Very High	BCmicrO|BiTargeting|CoMeTa|ElMMo3|MBStar|microrna.org|MirAncesTar|Mirza-G|RepTar|RNAhybrid|TargetRank
SPATA18	Q8TC71		hsa-miR-190b	0.388558	13	Very High	BCmicrO|DIANA|ElMMo3|MBStar|microrna.org|MirAncesTar|miRDB|MirMAP|Mirza-G|RepTar|RNAhybrid|TargetRank|TargetSpy
CD1C	P29017		hsa-miR-190b	0.387859	10	Very High	BCmicrO|CoMeTa|ElMMo3|MBStar|microrna.org|MirAncesTar|miRDB|RepTar|RNAhybrid|TargetSpy
C1GALT1C1	Q96EU7		hsa-miR-190b	0.387688	12	Very High	BCmicrO|DIANA|ElMMo3|microrna.org|mirbase|miRDB|MirMAP|MirSNP|Mirza-G|RNAhybrid|TargetRank|TargetSpy
GABPA	Q06546		hsa-miR-190b	0.387625	13	Very High	BCmicrO|BiTargeting|CoMeTa|DIANA|ElMMo3|MBStar|microrna.org|MirAncesTar|miRDB|MirMAP|Mirza-G|RepTar|TargetSpy
CT47A6	Q5JQC4		hsa-miR-190b	0.387317	11	Very High	BCmicrO|DIANA|ElMMo3|MBStar|microrna.org|MirAncesTar|miRDB|MirMAP|Mirza-G|RNAhybrid|TargetSpy
CT47A11	Q5JQC4		hsa-miR-190b	0.387158	10	Very High	BCmicrO|DIANA|ElMMo3|MBStar|microrna.org|MirAncesTar|miRDB|MirMAP|Mirza-G|TargetSpy
DRP2	Q13474		hsa-miR-190b	0.387132	12	Very High	BCmicrO|DIANA|ElMMo3|MBStar|microrna.org|MirAncesTar|MirMAP|Mirza-G|RepTar|RNAhybrid|TargetRank|TargetSpy
FAM110B	Q8TC76		hsa-miR-190b	0.386359	11	Very High	BCmicrO|CoMeTa|DIANA|ElMMo3|MBStar|MirAncesTar|MirMAP|Mirza-G|RepTar|RNAhybrid|TargetScan
OSBP2	Q969R2		hsa-miR-190b	0.384948	12	Very High	BCmicrO|CoMeTa|DIANA|ElMMo3|MBStar|microrna.org|MirAncesTar|miRDB|MirMAP|RepTar|RNAhybrid|TargetRank
STC2	O76061		hsa-miR-190b	0.384711	12	Very High	BCmicrO|CoMeTa|DIANA|ElMMo3|microrna.org|MirAncesTar|miRDB|MirMAP|Mirza-G|RepTar|RNAhybrid|TargetSpy
EDNRA	P25101		hsa-miR-190b	0.384609	13	Very High	BCmicrO|DIANA|ElMMo3|MBStar|microrna.org|MirAncesTar|miRDB|MirMAP|MirSNP|Mirza-G|RNAhybrid|TargetRank|TargetSpy
PRPF39	Q86UA1		hsa-miR-190b	0.38443	12	Very High	BCmicrO|Cupid|DIANA|ElMMo3|MBStar|microrna.org|MirAncesTar|MirMAP|Mirza-G|RepTar|RNAhybrid|TargetSpy
AKIRIN1	Q9H9L7		hsa-miR-190b	0.383788	10	Very High	BCmicrO|CoMeTa|Cupid|ElMMo3|MBStar|microrna.org|MirAncesTar|MirMAP|RepTar|RNAhybrid
LNX2	Q8N448		hsa-miR-190b	0.38371	12	Very High	BCmicrO|DIANA|ElMMo3|MBStar|microrna.org|MirAncesTar|MirMAP|MirSNP|MirTar|Mirza-G|RepTar|TargetSpy
HSPA4L	O95757		hsa-miR-190b	0.383247	8	Very High	BCmicrO|DIANA|MirAncesTar|mirbase|MirMAP|RepTar|RNAhybrid|TargetScan
SEC22A	Q96IW7		hsa-miR-190b	0.383178	12	Very High	BCmicrO|CoMeTa|DIANA|ElMMo3|MBStar|microrna.org|MirAncesTar|miRDB|MirMAP|RepTar|RNAhybrid|TargetRank
G3BP2	Q9UN86		hsa-miR-190b	0.382633	13	Very High	BCmicrO|DIANA|ElMMo3|MBStar|microrna.org|MirAncesTar|miRDB|MirMAP|Mirza-G|MultiMiTar|RepTar|RNAhybrid|TargetRank
CNR1	P21554		hsa-miR-190b	0.382592	13	Very High	BCmicrO|DIANA|ElMMo3|MBStar|microrna.org|MirAncesTar|MirMAP|Mirza-G|MultiMiTar|RepTar|RNAhybrid|TargetRank|TargetSpy

## Sheet: hsa-miR-210-3p
Generated at: 2020/04/11 13:24:20
mirDIP version: 4.1.11.1.
Database version: 4.1.0.3
Gene Symbol -
Micro RNA - hsa-miR-210-3p
Minimum Score - Very High
Results (203)
Gene Symbol	Uniprot	Pseudogene	MicroRNA	Integrated Score	Number of Sources	Score Class	Sources
ISCU	Q9H1K1		hsa-miR-210-3p	0.819519	19	Very High	BCmicrO|BiTargeting|CoMeTa|ElMMo3|MAMI|microrna.org|MirAncesTar|mirbase|miRcode|mirCoX|MirMAP|MirSNP|MirTar|Mirza-G|PACCMIT|RepTar|RNAhybrid|TargetRank|TargetScan
FGFRL1	Q8N441		hsa-miR-210-3p	0.725243	18	Very High	BCmicrO|BiTargeting|ElMMo3|MBStar|MAMI|microrna.org|MirAncesTar|mirbase|miRcode|mirCoX|miRDB|MirMAP|MirSNP|MirTar|Mirza-G|RepTar|RNAhybrid|TargetScan
DIMT1	Q9UNQ2		hsa-miR-210-3p	0.713423	19	Very High	BCmicrO|BiTargeting|CoMeTa|ElMMo3|MAMI|microrna.org|MirAncesTar|mirbase|miRcode|mirCoX|miRDB|MirMAP|MirSNP|miRTar2GO|Mirza-G|RepTar|RNAhybrid|TargetRank|TargetScan
GPD1L	Q8N335		hsa-miR-210-3p	0.687281	18	Very High	BCmicrO|CoMeTa|ElMMo3|MAMI|microrna.org|MirAncesTar|mirbase|miRcode|mirCoX|miRDB|MirMAP|MirSNP|Mirza-G|PACCMIT|RepTar|RNAhybrid|TargetRank|TargetScan
KMT2D	O14686		hsa-miR-210-3p	0.681569	17	Very High	BCmicrO|CoMeTa|ElMMo3|microrna.org|MirAncesTar|miRcode|mirCoX|miRDB|MirMAP|miRTar2GO|Mirza-G|MultiMiTar|PITA|RepTar|RNAhybrid|TargetRank|TargetScan
E2F3	O00716		hsa-miR-210-3p	0.68036	17	Very High	BCmicrO|CoMeTa|Cupid|DIANA|ElMMo3|MBStar|microrna.org|MirAncesTar|mirbase|miRcode|mirCoX|miRDB|MirMAP|Mirza-G|MultiMiTar|RepTar|TargetScan
BAZ2B	Q9UIF8		hsa-miR-210-3p	0.677609	15	Very High	BCmicrO|CoMeTa|Cupid|ElMMo3|microrna.org|MirAncesTar|miRcode|mirCoX|miRDB|MirMAP|miRTar2GO|Mirza-G|MultiMiTar|RNAhybrid|TargetScan
EFNA3	P52797		hsa-miR-210-3p	0.668241	19	Very High	BCmicrO|CoMeTa|ElMMo3|MBStar|MAMI|microrna.org|MirAncesTar|mirbase|miRcode|mirCoX|miRDB|MirMAP|MirSNP|Mirza-G|MultiMiTar|RepTar|RNA22|RNAhybrid|TargetScan
ZNF462	Q96JM2		hsa-miR-210-3p	0.653698	15	Very High	BCmicrO|ElMMo3|MBStar|microrna.org|MirAncesTar|mirbase|miRcode|mirCoX|MirMAP|MirSNP|Mirza-G|MultiMiTar|RNAhybrid|TargetRank|TargetScan
CYGB	Q8WWM9		hsa-miR-210-3p	0.648199	17	Very High	BCmicrO|DIANA|ElMMo3|MAMI|microrna.org|MirAncesTar|mirbase|miRcode|mirCoX|miRDB|MirMAP|Mirza-G|MultiMiTar|PACCMIT|PITA|RNAhybrid|TargetScan
B4GALT5	O43286		hsa-miR-210-3p	0.629135	15	Very High	BCmicrO|BiTargeting|CoMeTa|DIANA|ElMMo3|MirAncesTar|miRcode|mirCoX|miRDB|MirMAP|miRTar2GO|Mirza-G|PACCMIT|RepTar|TargetScan
SUZ12	Q15022		hsa-miR-210-3p	0.62846	18	Very High	BCmicrO|CoMeTa|Cupid|DIANA|ElMMo3|MBStar|MAMI|microrna.org|MirAncesTar|mirbase|miRcode|mirCoX|MirMAP|miRTar2GO|Mirza-G|MultiMiTar|RepTar|RNAhybrid
MYT1L	Q9UL68		hsa-miR-210-3p	0.627938	19	Very High	BCmicrO|BiTargeting|CoMeTa|ElMMo3|MBStar|MAMI|microrna.org|MirAncesTar|mirbase|miRcode|mirCoX|miRDB|MirMAP|MirSNP|miRTar2GO|Mirza-G|MultiMiTar|RepTar|RNAhybrid
MIGA2	Q7L4E1		hsa-miR-210-3p	0.626889	16	Very High	BCmicrO|ElMMo3|MAMI|microrna.org|MirAncesTar|mirbase|miRcode|mirCoX|miRDB|MirMAP|Mirza-G|PITA|RepTar|RNAhybrid|TargetRank|TargetScan
GGNBP2	Q9H3C7		hsa-miR-210-3p	0.617572	15	Very High	BCmicrO|CoMeTa|Cupid|ElMMo3|microrna.org|MirAncesTar|mirbase|miRcode|mirCoX|miRDB|MirMAP|MirTar|miRTar2GO|MultiMiTar|RNAhybrid
SYNGAP1	Q96PV0		hsa-miR-210-3p	0.616325	16	Very High	BCmicrO|DIANA|ElMMo3|MBStar|microrna.org|MirAncesTar|miRcode|mirCoX|miRDB|MirMAP|miRTar2GO|MultiMiTar|PACCMIT|RepTar|RNAhybrid|TargetScan
NR1D2	Q14995		hsa-miR-210-3p	0.616183	17	Very High	BCmicrO|CoMeTa|ElMMo3|MBStar|microrna.org|MirAncesTar|miRcode|mirCoX|miRDB|MirMAP|MirTar|miRTar2GO|Mirza-G|PITA|RepTar|RNAhybrid|TargetRank
DENND6A	Q8IWF6		hsa-miR-210-3p	0.612927	13	Very High	BCmicrO|ElMMo3|MBStar|microrna.org|MirAncesTar|miRcode|mirCoX|miRDB|MirMAP|miRTar2GO|Mirza-G|PACCMIT|TargetScan
NDUFA4	O00483		hsa-miR-210-3p	0.610064	14	Very High	BCmicrO|CoMeTa|MBStar|microrna.org|MirAncesTar|miRcode|mirCoX|MirMAP|miRTar2GO|Mirza-G|MultiMiTar|RepTar|RNAhybrid|TargetScan
CELF2	O95319		hsa-miR-210-3p	0.608626	18	Very High	BCmicrO|BiTargeting|CoMeTa|DIANA|ElMMo3|MBStar|MirAncesTar|miRcode|mirCoX|miRDB|MirMAP|miRTar2GO|Mirza-G|MultiMiTar|PITA|RepTar|RNAhybrid|TargetScan
NPTX1	Q15818		hsa-miR-210-3p	0.607328	14	Very High	BCmicrO|CoMeTa|ElMMo3|MAMI|MirAncesTar|mirbase|miRcode|mirCoX|miRDB|MirMAP|Mirza-G|PACCMIT|PITA|RepTar
HDAC4	P56524		hsa-miR-210-3p	0.604664	15	Very High	BCmicrO|CoMeTa|ElMMo3|MBStar|MAMI|microrna.org|MirAncesTar|miRcode|mirCoX|miRDB|MirMAP|MirSNP|miRTar2GO|MultiMiTar|RNAhybrid
GOLPH3	Q9H4A6		hsa-miR-210-3p	0.603238	16	Very High	BCmicrO|CoMeTa|Cupid|ElMMo3|microrna.org|MirAncesTar|mirbase|miRcode|mirCoX|miRDB|MirMAP|miRTar2GO|Mirza-G|MultiMiTar|RepTar|RNAhybrid
BDNF	P23560		hsa-miR-210-3p	0.602753	11	Very High	BCmicrO|CoMeTa|Cupid|microrna.org|MirAncesTar|miRcode|mirCoX|MirMAP|Mirza-G|MultiMiTar|TargetScan
ARMC1	Q9NVT9		hsa-miR-210-3p	0.599829	15	Very High	BCmicrO|CoMeTa|Cupid|ElMMo3|MAMI|microrna.org|MirAncesTar|miRcode|mirCoX|miRDB|MirMAP|miRTar2GO|Mirza-G|RepTar|RNAhybrid
RUNX3	Q13761		hsa-miR-210-3p	0.597053	18	Very High	BCmicrO|CoMeTa|ElMMo3|MBStar|microrna.org|MirAncesTar|miRcode|mirCoX|miRDB|MirMAP|MirTar|miRTar2GO|Mirza-G|MultiMiTar|PITA|RNA22|RNAhybrid|TargetRank
INHBB	P09529		hsa-miR-210-3p	0.583745	18	Very High	BCmicrO|CoMeTa|Cupid|ElMMo3|MBStar|MAMI|microrna.org|MirAncesTar|miRcode|mirCoX|miRDB|MirMAP|MirSNP|Mirza-G|MultiMiTar|PITA|RepTar|RNAhybrid
CAMTA1	Q9Y6Y1		hsa-miR-210-3p	0.583622	19	Very High	BCmicrO|BiTargeting|CoMeTa|DIANA|ElMMo3|MBStar|microrna.org|MirAncesTar|miRcode|mirCoX|miRDB|MirMAP|miRTar2GO|Mirza-G|MultiMiTar|RepTar|RNA22|RNAhybrid|TargetRank
KCMF1	Q9P0J7		hsa-miR-210-3p	0.581759	15	Very High	BCmicrO|BiTargeting|CoMeTa|ElMMo3|MBStar|MirAncesTar|miRcode|mirCoX|miRDB|MirMAP|miRTar2GO|Mirza-G|MultiMiTar|PACCMIT|TargetScan
NEUROD2	Q15784		hsa-miR-210-3p	0.581756	15	Very High	BCmicrO|CoMeTa|ElMMo3|MAMI|microrna.org|MirAncesTar|miRcode|mirCoX|miRDB|MirSNP|Mirza-G|MultiMiTar|PACCMIT|RepTar|TargetRank
TET2	Q6N021		hsa-miR-210-3p	0.577846	14	Very High	BCmicrO|Cupid|ElMMo3|MBStar|microrna.org|MirAncesTar|miRcode|mirCoX|MirMAP|MirSNP|miRTar2GO|Mirza-G|RNAhybrid|TargetScan
FCHSD2	O94868		hsa-miR-210-3p	0.569341	16	Very High	BCmicrO|CoMeTa|DIANA|ElMMo3|MBStar|microrna.org|MirAncesTar|miRcode|mirCoX|miRDB|MirMAP|miRTar2GO|Mirza-G|MultiMiTar|RNAhybrid|TargetRank
ZNF407	Q9C0G0		hsa-miR-210-3p	0.565249	15	Very High	BCmicrO|ElMMo3|MAMI|microrna.org|MirAncesTar|miRcode|mirCoX|miRDB|MirMAP|miRTar2GO|Mirza-G|MultiMiTar|RepTar|RNAhybrid|TargetRank
SDF2	Q99470		hsa-miR-210-3p	0.561149	16	Very High	BCmicrO|BiTargeting|DIANA|ElMMo3|MAMI|microrna.org|MirAncesTar|mirbase|miRcode|mirCoX|miRDB|MirMAP|MirTar|miRTar2GO|RNAhybrid|TargetRank
ACVR1B	P36896		hsa-miR-210-3p	0.557205	15	Very High	BCmicrO|BiTargeting|CoMeTa|ElMMo3|microrna.org|MirAncesTar|miRcode|mirCoX|miRDB|MirMAP|MirTar|Mirza-G|MultiMiTar|RNAhybrid|TargetRank
CPEB2	Q7Z5Q1		hsa-miR-210-3p	0.556579	11	Very High	BCmicrO|Cupid|MBStar|miRcode|mirCoX|MirMAP|miRTar2GO|Mirza-G|MultiMiTar|RNAhybrid|TargetScan
2020-09-08	Q92599		hsa-miR-210-3p	0.556312	13	Very High	BCmicrO|BiTargeting|CoMeTa|ElMMo3|microrna.org|MirAncesTar|miRcode|mirCoX|MirMAP|MirSNP|PACCMIT|RNAhybrid|TargetScan
ELFN2	Q5R3F8		hsa-miR-210-3p	0.554298	15	Very High	BCmicrO|BiTargeting|ElMMo3|MBStar|MirAncesTar|mirbase|miRcode|mirCoX|miRDB|MirMAP|miRTar2GO|PACCMIT|PITA|RepTar|TargetScan
RAP2B	P61225		hsa-miR-210-3p	0.552945	11	Very High	BCmicrO|BiTargeting|CoMeTa|MirAncesTar|miRcode|mirCoX|MirMAP|miRTar2GO|MultiMiTar|PITA|TargetScan
SCARA3	Q6AZY7		hsa-miR-210-3p	0.545375	14	Very High	BCmicrO|ElMMo3|MBStar|microrna.org|MirAncesTar|miRcode|mirCoX|miRDB|MirMAP|MirSNP|miRTar2GO|RepTar|RNAhybrid|TargetScan
GIT2	Q14161		hsa-miR-210-3p	0.543454	15	Very High	BCmicrO|CoMeTa|ElMMo3|MBStar|microrna.org|MirAncesTar|miRcode|mirCoX|miRDB|MirMAP|miRTar2GO|Mirza-G|RepTar|RNAhybrid|TargetRank
USP6NL	Q92738		hsa-miR-210-3p	0.540837	17	Very High	BCmicrO|BiTargeting|DIANA|ElMMo3|MBStar|microrna.org|MirAncesTar|mirbase|miRcode|mirCoX|miRDB|MirMAP|miRTar2GO|Mirza-G|RepTar|RNAhybrid|TargetScan
FAM89B	Q8N5H3		hsa-miR-210-3p	0.540688	14	Very High	BCmicrO|CoMeTa|ElMMo3|microrna.org|MirAncesTar|miRcode|mirCoX|miRDB|MirMAP|MirSNP|miRTar2GO|Mirza-G|RNAhybrid|TargetScan
HIVEP2	P31629		hsa-miR-210-3p	0.536243	16	Very High	BCmicrO|BiTargeting|CoMeTa|ElMMo3|MBStar|microrna.org|MirAncesTar|miRcode|mirCoX|miRDB|MirMAP|miRTar2GO|Mirza-G|RepTar|RNAhybrid|TargetRank
CCNL2	Q96S94		hsa-miR-210-3p	0.535905	17	Very High	BCmicrO|BiTargeting|CoMeTa|ElMMo3|microrna.org|MirAncesTar|mirbase|miRcode|mirCoX|MirMAP|miRTar2GO|Mirza-G|MultiMiTar|RepTar|RNA22|RNAhybrid|TargetRank
MID1IP1	Q9NPA3		hsa-miR-210-3p	0.532022	13	Very High	BCmicrO|BiTargeting|CoMeTa|DIANA|microrna.org|MirAncesTar|miRcode|mirCoX|MirMAP|miRTar2GO|Mirza-G|RNAhybrid|TargetScan
TNPO2	O14787		hsa-miR-210-3p	0.529314	17	Very High	BCmicrO|BiTargeting|CoMeTa|ElMMo3|MBStar|MAMI|MirAncesTar|miRcode|mirCoX|miRDB|MirMAP|miRTar2GO|Mirza-G|MultiMiTar|PITA|RepTar|RNAhybrid
RAB27B	O00194		hsa-miR-210-3p	0.527391	16	Very High	BCmicrO|CoMeTa|DIANA|ElMMo3|MBStar|microrna.org|MirAncesTar|mirbase|miRcode|mirCoX|miRDB|MirMAP|MirSNP|Mirza-G|RepTar|TargetRank
IGF2	P01344		hsa-miR-210-3p	0.525252	15	Very High	BCmicrO|BiTargeting|DIANA|ElMMo3|MirAncesTar|miRcode|mirCoX|miRDB|MirMAP|MirSNP|MirTar|PITA|RepTar|RNAhybrid|TargetRank
HMGCS1	Q01581		hsa-miR-210-3p	0.524662	16	Very High	BCmicrO|BiTargeting|CoMeTa|ElMMo3|MBStar|microrna.org|MirAncesTar|miRcode|mirCoX|miRDB|MirMAP|miRTar2GO|Mirza-G|RepTar|RNAhybrid|TargetRank
HIF3A	Q9Y2N7		hsa-miR-210-3p	0.520798	16	Very High	BCmicrO|BiTargeting|CoMeTa|ElMMo3|MirAncesTar|mirbase|miRcode|mirCoX|miRDB|MirMAP|MirSNP|Mirza-G|MultiMiTar|RepTar|RNAhybrid|TargetScan
MBTD1	Q05BQ5		hsa-miR-210-3p	0.514475	16	Very High	BCmicrO|BiTargeting|Cupid|DIANA|ElMMo3|microrna.org|MirAncesTar|miRcode|mirCoX|miRDB|MirMAP|miRTar2GO|Mirza-G|PITA|RepTar|RNAhybrid
MFSD14B	Q5SR56		hsa-miR-210-3p	0.513593	14	Very High	BCmicrO|BiTargeting|ElMMo3|microrna.org|MirAncesTar|miRcode|mirCoX|miRDB|MirMAP|miRTar2GO|Mirza-G|RepTar|RNAhybrid|TargetRank
DSG1	Q02413		hsa-miR-210-3p	0.512868	15	Very High	BCmicrO|CoMeTa|DIANA|ElMMo3|MBStar|microrna.org|MirAncesTar|miRcode|mirCoX|miRDB|MirMAP|MirSNP|Mirza-G|MultiMiTar|TargetRank
TTC13	Q8NBP0		hsa-miR-210-3p	0.510924	16	Very High	BCmicrO|CoMeTa|ElMMo3|MBStar|MAMI|microrna.org|MirAncesTar|mirbase|miRcode|mirCoX|miRDB|MirMAP|MirTar|Mirza-G|RNA22|RNAhybrid
KAT6A	Q92794		hsa-miR-210-3p	0.510453	15	Very High	BCmicrO|CoMeTa|ElMMo3|MBStar|microrna.org|MirAncesTar|miRcode|mirCoX|miRDB|MirMAP|miRTar2GO|Mirza-G|MultiMiTar|RepTar|RNAhybrid
DTX1	Q86Y01		hsa-miR-210-3p	0.507107	14	Very High	BCmicrO|ElMMo3|MAMI|MirAncesTar|mirbase|miRcode|mirCoX|miRDB|MirMAP|MirSNP|MultiMiTar|PITA|RNAhybrid|TargetScan
ATG7	O95352		hsa-miR-210-3p	0.504012	12	Very High	BCmicrO|ElMMo3|MBStar|microrna.org|MirAncesTar|miRcode|mirCoX|miRDB|MirMAP|Mirza-G|RNAhybrid|TargetScan
PSAP	P07602		hsa-miR-210-3p	0.502289	15	Very High	BCmicrO|CoMeTa|ElMMo3|MBStar|microrna.org|MirAncesTar|miRcode|mirCoX|miRDB|MirMAP|MirTar|miRTar2GO|Mirza-G|PITA|RNAhybrid
SH3BGRL	O75368		hsa-miR-210-3p	0.500469	15	Very High	BCmicrO|DIANA|ElMMo3|microrna.org|MirAncesTar|mirbase|miRcode|mirCoX|miRDB|MirMAP|miRTar2GO|Mirza-G|RepTar|RNAhybrid|TargetRank
CLUH	O75153		hsa-miR-210-3p	0.499121	14	Very High	BCmicrO|ElMMo3|MirAncesTar|mirbase|miRcode|mirCoX|miRDB|MirMAP|miRTar2GO|Mirza-G|PITA|RepTar|RNAhybrid|TargetScan
KLF7	O75840		hsa-miR-210-3p	0.494777	13	Very High	BCmicrO|BiTargeting|CoMeTa|MBStar|MirAncesTar|miRcode|mirCoX|miRDB|MirMAP|miRTar2GO|PITA|RNAhybrid|TargetScan
RUNX1T1	Q06455		hsa-miR-210-3p	0.493819	15	Very High	BCmicrO|CoMeTa|DIANA|ElMMo3|MBStar|MAMI|microrna.org|MirAncesTar|miRcode|mirCoX|miRDB|MirMAP|MirSNP|RepTar|RNAhybrid
SPRED2	Q7Z698		hsa-miR-210-3p	0.493533	16	Very High	BCmicrO|DIANA|ElMMo3|MBStar|microrna.org|MirAncesTar|miRcode|mirCoX|miRDB|MirMAP|MirSNP|MirTar|miRTar2GO|Mirza-G|RNAhybrid|TargetRank
DLX1	P56177		hsa-miR-210-3p	0.49296	14	Very High	BCmicrO|DIANA|ElMMo3|MBStar|microrna.org|MirAncesTar|miRcode|mirCoX|miRDB|MirMAP|miRTar2GO|Mirza-G|RNAhybrid|TargetRank
LEPROTL1	O95214		hsa-miR-210-3p	0.49127	15	Very High	BCmicrO|BiTargeting|CoMeTa|DIANA|ElMMo3|MAMI|microrna.org|MirAncesTar|miRcode|mirCoX|miRDB|MirMAP|miRTar2GO|Mirza-G|RNAhybrid
BICRAL	Q6AI39		hsa-miR-210-3p	0.491048	13	Very High	BCmicrO|CoMeTa|DIANA|ElMMo3|microrna.org|MirAncesTar|miRcode|mirCoX|miRDB|MirMAP|miRTar2GO|Mirza-G|MultiMiTar
CHN1	P15882		hsa-miR-210-3p	0.490657	16	Very High	BCmicrO|BiTargeting|CoMeTa|DIANA|ElMMo3|microrna.org|MirAncesTar|mirbase|miRcode|mirCoX|miRDB|MirMAP|miRTar2GO|Mirza-G|RepTar|RNAhybrid
EPB41L1	Q9H4G0		hsa-miR-210-3p	0.489905	18	Very High	BCmicrO|BiTargeting|CoMeTa|DIANA|ElMMo3|MBStar|microrna.org|MirAncesTar|mirbase|miRcode|mirCoX|miRDB|MirMAP|miRTar2GO|Mirza-G|PITA|RepTar|RNAhybrid
NAA30	Q147X3		hsa-miR-210-3p	0.489451	13	Very High	BCmicrO|Cupid|ElMMo3|MirAncesTar|miRcode|mirCoX|MirMAP|miRTar2GO|Mirza-G|MultiMiTar|PITA|RNAhybrid|TargetRank
SLC25A26	Q70HW3		hsa-miR-210-3p	0.488921	13	Very High	BCmicrO|ElMMo3|microrna.org|MirAncesTar|miRcode|mirCoX|miRDB|MirMAP|MirTar|Mirza-G|PITA|RNAhybrid|TargetRank
ZXDB	P98169		hsa-miR-210-3p	0.487104	15	Very High	BCmicrO|CoMeTa|DIANA|ElMMo3|MBStar|microrna.org|MirAncesTar|miRcode|mirCoX|miRDB|MirMAP|miRTar2GO|Mirza-G|RepTar|TargetRank
NFIX	Q14938		hsa-miR-210-3p	0.483865	17	Very High	BCmicrO|BiTargeting|CoMeTa|ElMMo3|MBStar|MirAncesTar|miRcode|mirCoX|miRDB|MirMAP|MirSNP|miRTar2GO|PACCMIT|PITA|RepTar|RNAhybrid|TargetScan
ONECUT2	O95948		hsa-miR-210-3p	0.481356	14	Very High	BCmicrO|CoMeTa|ElMMo3|MBStar|MirAncesTar|miRcode|mirCoX|miRDB|MirMAP|miRTar2GO|Mirza-G|MultiMiTar|PITA|RepTar
METTL13	Q8N6R0		hsa-miR-210-3p	0.475653	16	Very High	BCmicrO|DIANA|ElMMo3|MBStar|microrna.org|MirAncesTar|miRcode|mirCoX|miRDB|MirMAP|MirSNP|MirTar|miRTar2GO|Mirza-G|RNA22|RNAhybrid
CNRIP1	Q96F85		hsa-miR-210-3p	0.473524	14	Very High	BCmicrO|ElMMo3|MAMI|microrna.org|MirAncesTar|mirbase|miRcode|mirCoX|miRDB|MirMAP|miRTar2GO|Mirza-G|RepTar|RNAhybrid
VAMP7	P51809		hsa-miR-210-3p	0.472727	13	Very High	BCmicrO|CoMeTa|DIANA|ElMMo3|MBStar|microrna.org|MirAncesTar|mirCoX|miRDB|MirMAP|miRTar2GO|RepTar|RNAhybrid
YES1	P07947		hsa-miR-210-3p	0.47243	10	Very High	BCmicrO|BiTargeting|CoMeTa|MBStar|MAMI|MirAncesTar|mirCoX|miRTar2GO|MultiMiTar|RepTar
ST3GAL3	Q11203		hsa-miR-210-3p	0.469974	13	Very High	BCmicrO|BiTargeting|microrna.org|MirAncesTar|mirbase|miRcode|mirCoX|miRDB|MirMAP|PITA|RNA22|RNAhybrid|TargetScan
IPO5	O00410		hsa-miR-210-3p	0.469192	15	Very High	BCmicrO|BiTargeting|ElMMo3|microrna.org|MirAncesTar|mirbase|miRcode|mirCoX|miRDB|MirMAP|miRTar2GO|Mirza-G|RepTar|RNAhybrid|TargetRank
SLC6A1	P30531		hsa-miR-210-3p	0.468409	13	Very High	BCmicrO|CoMeTa|DIANA|ElMMo3|microrna.org|MirAncesTar|miRcode|mirCoX|miRDB|MirMAP|Mirza-G|RepTar|TargetRank
AIFM3	Q96NN9		hsa-miR-210-3p	0.468093	13	Very High	BCmicrO|DIANA|ElMMo3|microrna.org|MirAncesTar|mirbase|miRcode|mirCoX|miRDB|MirMAP|MirTar|RNAhybrid|TargetRank
PPP1CB	P62140		hsa-miR-210-3p	0.467579	13	Very High	BCmicrO|CoMeTa|ElMMo3|MBStar|microrna.org|MirAncesTar|miRcode|mirCoX|miRDB|MirMAP|miRTar2GO|Mirza-G|RNAhybrid
SMG5	Q9UPR3		hsa-miR-210-3p	0.466409	15	Very High	BCmicrO|BiTargeting|CoMeTa|ElMMo3|microrna.org|MirAncesTar|miRcode|mirCoX|miRDB|MirMAP|miRTar2GO|Mirza-G|MultiMiTar|RNA22|RNAhybrid
ELOVL6	Q9H5J4		hsa-miR-210-3p	0.464815	15	Very High	BCmicrO|BiTargeting|CoMeTa|ElMMo3|MBStar|microrna.org|MirAncesTar|mirbase|miRcode|mirCoX|miRDB|MirMAP|miRTar2GO|Mirza-G|RNAhybrid
KLF12	Q9Y4X4		hsa-miR-210-3p	0.46291	13	Very High	BCmicrO|BiTargeting|CoMeTa|ElMMo3|MBStar|MirAncesTar|miRcode|mirCoX|miRDB|MirMAP|miRTar2GO|RepTar|TargetRank
SIN3A	Q96ST3		hsa-miR-210-3p	0.462116	14	Very High	BCmicrO|BiTargeting|CoMeTa|ElMMo3|microrna.org|MirAncesTar|miRcode|mirCoX|miRDB|MirMAP|miRTar2GO|Mirza-G|RepTar|RNAhybrid
STAT6	P42226		hsa-miR-210-3p	0.461279	15	Very High	BCmicrO|BiTargeting|CoMeTa|ElMMo3|MBStar|microrna.org|MirAncesTar|mirbase|miRcode|mirCoX|miRDB|MirMAP|miRTar2GO|RepTar|RNAhybrid
INSIG1	O15503		hsa-miR-210-3p	0.460589	14	Very High	BCmicrO|CoMeTa|ElMMo3|MBStar|microrna.org|MirAncesTar|miRcode|mirCoX|miRDB|MirMAP|miRTar2GO|Mirza-G|MultiMiTar|RNAhybrid
KRAS	P01116		hsa-miR-210-3p	0.45972	10	Very High	BCmicrO|CoMeTa|Cupid|MBStar|MirAncesTar|mirCoX|miRTar2GO|MultiMiTar|RepTar|RNAhybrid
H2AFY	O75367		hsa-miR-210-3p	0.455843	14	Very High	BCmicrO|BiTargeting|CoMeTa|ElMMo3|microrna.org|MirAncesTar|mirbase|miRcode|mirCoX|MirMAP|miRTar2GO|Mirza-G|RepTar|RNAhybrid
SLC16A14	Q7RTX9		hsa-miR-210-3p	0.455343	13	Very High	BCmicrO|DIANA|ElMMo3|microrna.org|MirAncesTar|mirbase|miRcode|mirCoX|miRDB|MirMAP|MirSNP|Mirza-G|TargetRank
CORO2B	Q9UQ03		hsa-miR-210-3p	0.45525	14	Very High	BCmicrO|ElMMo3|MBStar|microrna.org|MirAncesTar|miRcode|mirCoX|miRDB|MirMAP|MirSNP|MirTar|Mirza-G|RNAhybrid|TargetRank
MNT	Q99583		hsa-miR-210-3p	0.453875	16	Very High	BCmicrO|BiTargeting|CoMeTa|ElMMo3|microrna.org|MirAncesTar|miRcode|mirCoX|miRDB|MirMAP|MirSNP|Mirza-G|MultiMiTar|PITA|RepTar|RNAhybrid
WLS	Q5T9L3		hsa-miR-210-3p	0.453403	14	Very High	BCmicrO|CoMeTa|ElMMo3|microrna.org|MirAncesTar|mirbase|miRcode|mirCoX|MirMAP|MirSNP|Mirza-G|RepTar|RNA22|RNAhybrid
GET4	Q7L5D6		hsa-miR-210-3p	0.453119	14	Very High	BCmicrO|ElMMo3|microrna.org|MirAncesTar|miRcode|mirCoX|miRDB|MirMAP|MirSNP|miRTar2GO|Mirza-G|RepTar|RNAhybrid|TargetRank
NEFM	P07197		hsa-miR-210-3p	0.451233	12	Very High	BCmicrO|BiTargeting|CoMeTa|MBStar|MAMI|microrna.org|MirAncesTar|mirbase|mirCoX|MultiMiTar|RepTar|RNAhybrid
AKAP2	Q9Y2D5		hsa-miR-210-3p	0.44992	13	Very High	BCmicrO|CoMeTa|DIANA|ElMMo3|microrna.org|MirAncesTar|miRcode|mirCoX|miRDB|MirMAP|miRTar2GO|Mirza-G|RNAhybrid
GDE1	Q9NZC3		hsa-miR-210-3p	0.449891	13	Very High	BCmicrO|CoMeTa|DIANA|ElMMo3|microrna.org|MirAncesTar|miRcode|mirCoX|miRDB|MirMAP|PITA|RNAhybrid|TargetRank
CELF1	Q92879		hsa-miR-210-3p	0.449828	13	Very High	BCmicrO|BiTargeting|CoMeTa|ElMMo3|MBStar|MirAncesTar|miRcode|mirCoX|miRDB|MirMAP|miRTar2GO|Mirza-G|RNAhybrid
TSTD2	Q5T7W7		hsa-miR-210-3p	0.447822	13	Very High	BCmicrO|CoMeTa|DIANA|ElMMo3|microrna.org|MirAncesTar|miRcode|mirCoX|miRDB|MirMAP|miRTar2GO|MultiMiTar|RepTar
PPTC7	Q8NI37		hsa-miR-210-3p	0.446891	9	Very High	BCmicrO|BiTargeting|MBStar|MirAncesTar|miRcode|mirCoX|MirMAP|miRTar2GO|TargetScan
SIN3B	O75182		hsa-miR-210-3p	0.446872	16	Very High	BCmicrO|BiTargeting|CoMeTa|ElMMo3|MAMI|microrna.org|MirAncesTar|mirbase|miRcode|mirCoX|MirMAP|MirSNP|Mirza-G|PITA|RepTar|RNAhybrid
SEC24B	O95487		hsa-miR-210-3p	0.446663	14	Very High	BCmicrO|CoMeTa|Cupid|ElMMo3|MBStar|microrna.org|MirAncesTar|miRcode|mirCoX|miRDB|MirMAP|Mirza-G|RepTar|RNAhybrid
SEH1L	Q96EE3		hsa-miR-210-3p	0.446556	10	Very High	BCmicrO|BiTargeting|CoMeTa|MAMI|MirAncesTar|mirCoX|miRTar2GO|MultiMiTar|RepTar|RNAhybrid
ZFAND3	Q9H8U3		hsa-miR-210-3p	0.445427	13	Very High	BCmicrO|ElMMo3|microrna.org|MirAncesTar|miRcode|mirCoX|miRDB|MirMAP|MirSNP|miRTar2GO|Mirza-G|MultiMiTar|RNAhybrid
KPNA1	P52294		hsa-miR-210-3p	0.443303	14	Very High	BCmicrO|ElMMo3|MBStar|microrna.org|MirAncesTar|miRcode|mirCoX|miRDB|MirMAP|MirSNP|MirTar|miRTar2GO|Mirza-G|TargetRank
RECK	O95980		hsa-miR-210-3p	0.442972	12	Very High	BCmicrO|BiTargeting|CoMeTa|MBStar|MAMI|MirAncesTar|mirbase|mirCoX|miRTar2GO|MultiMiTar|RepTar|RNAhybrid
ENOX2	Q16206		hsa-miR-210-3p	0.442586	13	Very High	BCmicrO|CoMeTa|ElMMo3|microrna.org|MirAncesTar|miRcode|mirCoX|miRDB|MirMAP|MirSNP|Mirza-G|RNAhybrid|TargetRank
MXD4	Q14582		hsa-miR-210-3p	0.440838	15	Very High	BCmicrO|BiTargeting|ElMMo3|MBStar|MAMI|MirAncesTar|mirbase|miRcode|mirCoX|miRDB|MirMAP|miRTar2GO|PITA|RepTar|RNAhybrid
RCAN2	Q14206		hsa-miR-210-3p	0.439922	14	Very High	BCmicrO|BiTargeting|CoMeTa|DIANA|ElMMo3|MBStar|microrna.org|MirAncesTar|miRcode|mirCoX|miRDB|MirMAP|Mirza-G|MultiMiTar
ALDH5A1	P51649		hsa-miR-210-3p	0.439695	14	Very High	BCmicrO|DIANA|ElMMo3|microrna.org|MirAncesTar|miRcode|mirCoX|miRDB|MirMAP|MirTar|Mirza-G|PITA|RNAhybrid|TargetRank
MEF2A	Q02078		hsa-miR-210-3p	0.438509	9	Very High	BCmicrO|MirAncesTar|miRcode|mirCoX|MirMAP|miRTar2GO|Mirza-G|RNAhybrid|TargetScan
ABCB9	Q9NP78		hsa-miR-210-3p	0.437961	6	Very High	BCmicrO|CoMeTa|MirAncesTar|mirCoX|PicTar|RNAhybrid
NCAM1	P13591		hsa-miR-210-3p	0.435861	15	Very High	BCmicrO|BiTargeting|CoMeTa|ElMMo3|MBStar|MirAncesTar|miRcode|mirCoX|miRDB|MirMAP|MirSNP|Mirza-G|MultiMiTar|RepTar|RNAhybrid
RRP1B	Q14684		hsa-miR-210-3p	0.435597	13	Very High	BCmicrO|ElMMo3|MBStar|microrna.org|MirAncesTar|miRcode|mirCoX|miRDB|MirMAP|MirSNP|MirTar|miRTar2GO|Mirza-G
ZNF451	Q9Y4E5		hsa-miR-210-3p	0.434292	11	Very High	BCmicrO|CoMeTa|microrna.org|MirAncesTar|miRcode|mirCoX|miRDB|MirMAP|miRTar2GO|RepTar|RNAhybrid
MYH11	P35749		hsa-miR-210-3p	0.432975	15	Very High	BCmicrO|BiTargeting|ElMMo3|MAMI|microrna.org|MirAncesTar|mirbase|miRcode|mirCoX|miRDB|MirMAP|Mirza-G|MultiMiTar|RepTar|RNAhybrid
CHST1	O43916		hsa-miR-210-3p	0.432511	13	Very High	BCmicrO|CoMeTa|ElMMo3|MAMI|microrna.org|MirAncesTar|mirbase|miRcode|mirCoX|miRDB|MirMAP|Mirza-G|RepTar
ATP11A	P98196		hsa-miR-210-3p	0.431859	14	Very High	BCmicrO|BiTargeting|DIANA|ElMMo3|MirAncesTar|miRcode|mirCoX|miRDB|MirMAP|MirSNP|MirTar|miRTar2GO|RepTar|RNAhybrid
TNRC6B	Q9UPQ9		hsa-miR-210-3p	0.430307	12	Very High	BCmicrO|CoMeTa|ElMMo3|MBStar|MirAncesTar|miRcode|mirCoX|miRDB|MirMAP|miRTar2GO|RepTar|RNAhybrid
NSD3	Q9BZ95		hsa-miR-210-3p	0.429562	11	Very High	BCmicrO|Cupid|microrna.org|MirAncesTar|miRcode|mirCoX|MirMAP|miRTar2GO|Mirza-G|MultiMiTar|RNAhybrid
MTMR9	Q96QG7		hsa-miR-210-3p	0.429199	13	Very High	BCmicrO|CoMeTa|ElMMo3|MBStar|MirAncesTar|miRcode|mirCoX|miRDB|MirMAP|miRTar2GO|Mirza-G|RNAhybrid|TargetRank
PPP1R2	P41236		hsa-miR-210-3p	0.428275	12	Very High	BCmicrO|CoMeTa|ElMMo3|microrna.org|MirAncesTar|miRcode|mirCoX|miRDB|MirMAP|Mirza-G|RepTar|RNAhybrid
GCNT1	Q02742		hsa-miR-210-3p	0.427019	13	Very High	BCmicrO|ElMMo3|MBStar|microrna.org|MirAncesTar|miRcode|mirCoX|miRDB|MirMAP|miRTar2GO|Mirza-G|RepTar|TargetRank
TNPO3	Q9Y5L0		hsa-miR-210-3p	0.426375	14	Very High	BCmicrO|BiTargeting|ElMMo3|MBStar|microrna.org|MirAncesTar|mirbase|miRcode|mirCoX|miRDB|MirMAP|miRTar2GO|RepTar|RNAhybrid
SEMA5B	Q9P283		hsa-miR-210-3p	0.425258	15	Very High	BCmicrO|BiTargeting|ElMMo3|MBStar|microrna.org|MirAncesTar|miRcode|mirCoX|miRDB|MirMAP|MirSNP|Mirza-G|MultiMiTar|RepTar|RNAhybrid
MFSD4A	Q8N468		hsa-miR-210-3p	0.424693	17	Very High	BCmicrO|BiTargeting|ElMMo3|MAMI|microrna.org|MirAncesTar|mirbase|miRcode|mirCoX|miRDB|MirMAP|MirSNP|Mirza-G|PITA|RepTar|RNA22|RNAhybrid
PANX3	Q96QZ0		hsa-miR-210-3p	0.424131	13	Very High	BCmicrO|ElMMo3|MAMI|microrna.org|MirAncesTar|mirbase|miRcode|mirCoX|miRDB|MirMAP|Mirza-G|RepTar|RNAhybrid
EPHB2	P29323		hsa-miR-210-3p	0.423462	15	Very High	BCmicrO|BiTargeting|CoMeTa|ElMMo3|MBStar|MAMI|MirAncesTar|mirbase|mirCoX|MirMAP|MirSNP|MultiMiTar|RepTar|RNA22|RNAhybrid
SLC1A2	P43004		hsa-miR-210-3p	0.422683	15	Very High	BCmicrO|BiTargeting|CoMeTa|ElMMo3|MBStar|MirAncesTar|miRcode|mirCoX|miRDB|MirMAP|MirSNP|Mirza-G|MultiMiTar|RepTar|RNAhybrid
DHX58	Q96C10		hsa-miR-210-3p	0.422315	13	Very High	BCmicrO|DIANA|ElMMo3|microrna.org|MirAncesTar|mirbase|miRcode|mirCoX|miRDB|MirMAP|miRTar2GO|Mirza-G|RNAhybrid
PITHD1	Q9GZP4		hsa-miR-210-3p	0.421995	15	Very High	BCmicrO|BiTargeting|ElMMo3|microrna.org|MirAncesTar|mirbase|miRcode|mirCoX|MirMAP|MirSNP|miRTar2GO|Mirza-G|RepTar|RNA22|RNAhybrid
GRIK2	Q13002		hsa-miR-210-3p	0.421926	11	Very High	BCmicrO|CoMeTa|MBStar|microrna.org|MirAncesTar|mirbase|mirCoX|miRTar2GO|MultiMiTar|RepTar|RNAhybrid
TLX1	P31314		hsa-miR-210-3p	0.421772	14	Very High	BCmicrO|BiTargeting|CoMeTa|ElMMo3|microrna.org|MirAncesTar|mirbase|miRcode|mirCoX|miRDB|MirMAP|Mirza-G|RepTar|RNAhybrid
LRRC8A	Q8IWT6		hsa-miR-210-3p	0.421621	15	Very High	BCmicrO|BiTargeting|ElMMo3|MirAncesTar|mirbase|miRcode|mirCoX|miRDB|MirMAP|MirSNP|miRTar2GO|Mirza-G|MultiMiTar|RepTar|RNAhybrid
PPP1R9A	Q9ULJ8		hsa-miR-210-3p	0.421183	15	Very High	BCmicrO|BiTargeting|CoMeTa|ElMMo3|MBStar|MirAncesTar|miRcode|mirCoX|miRDB|MirMAP|miRTar2GO|Mirza-G|PITA|RepTar|RNAhybrid
CEND1	Q8N111		hsa-miR-210-3p	0.419209	14	Very High	BCmicrO|BiTargeting|ElMMo3|MBStar|MAMI|microrna.org|mirbase|miRcode|mirCoX|miRDB|MirMAP|MirTar|Mirza-G|RepTar
IP6K3	Q96PC2		hsa-miR-210-3p	0.41872	16	Very High	BCmicrO|DIANA|ElMMo3|MBStar|microrna.org|MirAncesTar|mirbase|miRcode|mirCoX|miRDB|MirMAP|Mirza-G|PITA|RepTar|RNAhybrid|TargetRank
TRIOBP	Q9H2D6		hsa-miR-210-3p	0.41859	15	Very High	BCmicrO|BiTargeting|ElMMo3|MBStar|microrna.org|MirAncesTar|miRcode|mirCoX|miRDB|MirMAP|MirSNP|miRTar2GO|PITA|RepTar|RNAhybrid
MGRN1	O60291		hsa-miR-210-3p	0.417802	15	Very High	BCmicrO|BiTargeting|ElMMo3|microrna.org|MirAncesTar|miRcode|mirCoX|miRDB|MirMAP|MirSNP|miRTar2GO|Mirza-G|PITA|RepTar|RNAhybrid
ADARB1	P78563		hsa-miR-210-3p	0.415558	12	Very High	BCmicrO|CoMeTa|MirAncesTar|miRcode|mirCoX|MirMAP|MirSNP|miRTar2GO|Mirza-G|MultiMiTar|PITA|RNAhybrid
FOXN3	O00409		hsa-miR-210-3p	0.41419	15	Very High	BCmicrO|BiTargeting|ElMMo3|MirAncesTar|mirbase|miRcode|mirCoX|miRDB|MirMAP|MirSNP|miRTar2GO|MultiMiTar|PITA|RepTar|RNAhybrid
DYRK2	Q92630		hsa-miR-210-3p	0.413789	12	Very High	BCmicrO|BiTargeting|CoMeTa|MBStar|MirAncesTar|miRcode|mirCoX|MirMAP|miRTar2GO|Mirza-G|MultiMiTar|RepTar
KMT2B	Q9UMN6		hsa-miR-210-3p	0.413684	10	Very High	BCmicrO|CoMeTa|miRcode|mirCoX|MirMAP|miRTar2GO|PITA|RepTar|RNAhybrid|TargetRank
FBXO31	Q5XUX0		hsa-miR-210-3p	0.413523	13	Very High	BCmicrO|BiTargeting|DIANA|ElMMo3|MBStar|MirAncesTar|miRcode|mirCoX|miRDB|MirMAP|miRTar2GO|Mirza-G|PACCMIT
POU2F1	P14859		hsa-miR-210-3p	0.412241	10	Very High	BCmicrO|BiTargeting|MBStar|microrna.org|MirAncesTar|miRcode|mirCoX|miRTar2GO|RNA22|RNAhybrid
ZNF626	Q68DY1		hsa-miR-210-3p	0.412045	12	Very High	BCmicrO|BiTargeting|ElMMo3|MBStar|microrna.org|MirAncesTar|miRcode|mirCoX|MirMAP|miRTar2GO|RNAhybrid|TargetRank
TYW5	A2RUC4		hsa-miR-210-3p	0.409275	13	Very High	BCmicrO|DIANA|ElMMo3|microrna.org|MirAncesTar|miRcode|mirCoX|miRDB|MirMAP|miRTar2GO|Mirza-G|RNAhybrid|TargetRank
CDIP1	Q9H305		hsa-miR-210-3p	0.40861	9	Very High	BCmicrO|MirAncesTar|miRcode|mirCoX|MirMAP|miRTar2GO|RepTar|RNAhybrid|TargetScan
CHRM3	P20309		hsa-miR-210-3p	0.406602	14	Very High	BCmicrO|ElMMo3|MBStar|MAMI|microrna.org|MirAncesTar|mirbase|miRcode|mirCoX|MirMAP|PITA|RepTar|RNA22|RNAhybrid
TBL1X	O60907		hsa-miR-210-3p	0.405987	9	Very High	BCmicrO|CoMeTa|MBStar|MAMI|MirAncesTar|mirCoX|miRTar2GO|MultiMiTar|PITA
RAPGEF2	Q9Y4G8		hsa-miR-210-3p	0.404792	10	Very High	BCmicrO|BiTargeting|CoMeTa|MBStar|MAMI|MirAncesTar|mirCoX|miRTar2GO|RepTar|RNAhybrid
RHOQ	P17081		hsa-miR-210-3p	0.404411	12	Very High	BCmicrO|CoMeTa|ElMMo3|MBStar|microrna.org|MirAncesTar|mirCoX|miRDB|miRTar2GO|Mirza-G|RepTar|RNAhybrid
RAB26	Q9ULW5		hsa-miR-210-3p	0.403887	14	Very High	BCmicrO|BiTargeting|ElMMo3|MAMI|MirAncesTar|mirbase|miRcode|mirCoX|miRDB|MirMAP|miRTar2GO|PITA|RepTar|RNAhybrid
MAPK1	P28482		hsa-miR-210-3p	0.403588	12	Very High	BCmicrO|ElMMo3|microrna.org|MirAncesTar|miRcode|mirCoX|miRDB|MirMAP|MirSNP|miRTar2GO|Mirza-G|TargetRank
DICER1	Q9UPY3		hsa-miR-210-3p	0.403074	12	Very High	BCmicrO|BiTargeting|Cupid|MBStar|MirAncesTar|miRcode|mirCoX|MirMAP|miRTar2GO|Mirza-G|MultiMiTar|RNAhybrid
SORBS2	O94875		hsa-miR-210-3p	0.402837	10	Very High	BCmicrO|CoMeTa|MBStar|MirAncesTar|mirbase|mirCoX|miRTar2GO|MultiMiTar|RepTar|RNAhybrid
CASC10	Q5T4H9		hsa-miR-210-3p	0.402815	13	Very High	BCmicrO|DIANA|ElMMo3|microrna.org|MirAncesTar|miRcode|mirCoX|miRDB|MirMAP|MirTar|Mirza-G|RepTar|TargetRank
CASC4	Q6P4E1		hsa-miR-210-3p	0.401683	10	Very High	BCmicrO|MBStar|microrna.org|MirAncesTar|miRcode|mirCoX|miRTar2GO|MultiMiTar|RepTar|RNAhybrid
FUT8	Q9BYC5		hsa-miR-210-3p	0.401661	11	Very High	BCmicrO|MBStar|MAMI|MirAncesTar|mirbase|miRcode|mirCoX|miRTar2GO|MultiMiTar|RepTar|RNAhybrid
TNPO1	Q92973		hsa-miR-210-3p	0.400972	11	Very High	BCmicrO|Cupid|MBStar|MirAncesTar|miRcode|mirCoX|MirMAP|Mirza-G|MultiMiTar|RepTar|RNAhybrid
ANTXR1	Q9H6X2		hsa-miR-210-3p	0.40061	15	Very High	BCmicrO|BiTargeting|CoMeTa|ElMMo3|MBStar|microrna.org|MirAncesTar|miRcode|mirCoX|MirMAP|MirSNP|miRTar2GO|Mirza-G|PITA|RNAhybrid
DCAF5	Q96JK2		hsa-miR-210-3p	0.399922	13	Very High	BCmicrO|ElMMo3|microrna.org|MirAncesTar|mirbase|miRcode|mirCoX|miRDB|MirMAP|Mirza-G|PITA|RNAhybrid|TargetRank
ZNF148	Q9UQR1		hsa-miR-210-3p	0.399773	10	Very High	BCmicrO|DIANA|MirAncesTar|miRcode|mirCoX|MirMAP|miRTar2GO|Mirza-G|MultiMiTar|RNAhybrid
CSF1	P09603		hsa-miR-210-3p	0.397822	14	Very High	BCmicrO|CoMeTa|ElMMo3|MBStar|microrna.org|MirAncesTar|miRcode|mirCoX|miRDB|MirMAP|MultiMiTar|RepTar|RNA22|RNAhybrid
ZNF827	Q17R98		hsa-miR-210-3p	0.397813	13	Very High	BCmicrO|BiTargeting|ElMMo3|MBStar|MirAncesTar|mirbase|miRcode|mirCoX|miRDB|MirMAP|MultiMiTar|PACCMIT|RNAhybrid
GPR39	O43194		hsa-miR-210-3p	0.397364	10	Very High	BCmicrO|BiTargeting|CoMeTa|MAMI|MirAncesTar|mirbase|mirCoX|miRTar2GO|MultiMiTar|RNAhybrid
LURAP1L	Q8IV03		hsa-miR-210-3p	0.397095	10	Very High	BCmicrO|ElMMo3|MBStar|microrna.org|MirAncesTar|mirCoX|miRDB|miRTar2GO|Mirza-G|TargetRank
FOXP1	Q9H334		hsa-miR-210-3p	0.397085	9	Very High	BCmicrO|CoMeTa|MBStar|microrna.org|MirAncesTar|mirCoX|miRTar2GO|MultiMiTar|RNAhybrid
CD59	P13987		hsa-miR-210-3p	0.39693	11	Very High	BCmicrO|CoMeTa|ElMMo3|MirAncesTar|mirCoX|miRDB|MirSNP|miRTar2GO|PITA|RNAhybrid|TargetRank
USH2A	O75445		hsa-miR-210-3p	0.396537	13	Very High	BCmicrO|ElMMo3|MBStar|microrna.org|MirAncesTar|miRcode|mirCoX|miRDB|MirMAP|Mirza-G|MultiMiTar|RNA22|RNAhybrid
WDFY2	Q96P53		hsa-miR-210-3p	0.396129	12	Very High	BCmicrO|ElMMo3|MBStar|MAMI|microrna.org|MirAncesTar|mirbase|mirCoX|miRDB|miRTar2GO|Mirza-G|RepTar
XPO7	Q9UIA9		hsa-miR-210-3p	0.396031	9	Very High	BCmicrO|DIANA|microrna.org|MirAncesTar|miRcode|mirCoX|miRTar2GO|RepTar|RNAhybrid
KCNA3	P22001		hsa-miR-210-3p	0.395876	12	Very High	BCmicrO|DIANA|MBStar|microrna.org|miRcode|mirCoX|MirMAP|miRTar2GO|Mirza-G|MultiMiTar|RNA22|RNAhybrid
TFAP2A	P05549		hsa-miR-210-3p	0.395261	10	Very High	BCmicrO|CoMeTa|microrna.org|MirAncesTar|mirbase|miRcode|mirCoX|miRTar2GO|RepTar|RNAhybrid
SLC38A1	Q9H2H9		hsa-miR-210-3p	0.395	11	Very High	BCmicrO|BiTargeting|CoMeTa|ElMMo3|microrna.org|MirAncesTar|mirCoX|miRDB|miRTar2GO|RepTar|RNAhybrid
FKBP1B	P68106		hsa-miR-210-3p	0.394254	13	Very High	BCmicrO|DIANA|MBStar|microrna.org|MirAncesTar|miRcode|mirCoX|MirMAP|miRTar2GO|Mirza-G|MultiMiTar|RepTar|RNAhybrid
NFIB	O00712		hsa-miR-210-3p	0.394251	10	Very High	BCmicrO|CoMeTa|MBStar|MirAncesTar|mirbase|mirCoX|miRTar2GO|MultiMiTar|RepTar|RNAhybrid
MEF2D	Q14814		hsa-miR-210-3p	0.393736	15	Very High	BCmicrO|BiTargeting|ElMMo3|MAMI|MirAncesTar|mirbase|miRcode|mirCoX|miRDB|MirMAP|miRTar2GO|PITA|RepTar|RNA22|RNAhybrid
KLF6	Q99612		hsa-miR-210-3p	0.391167	11	Very High	BCmicrO|BiTargeting|CoMeTa|MBStar|microrna.org|MirAncesTar|miRcode|mirCoX|miRTar2GO|RepTar|RNAhybrid
ZNF526	Q8TF50		hsa-miR-210-3p	0.389728	12	Very High	BCmicrO|ElMMo3|microrna.org|MirAncesTar|miRcode|mirCoX|miRDB|MirMAP|Mirza-G|PITA|RepTar|TargetRank
TFRC	P02786		hsa-miR-210-3p	0.38969	13	Very High	BCmicrO|CoMeTa|ElMMo3|MirAncesTar|miRcode|mirCoX|miRDB|MirMAP|MirSNP|miRTar2GO|Mirza-G|RepTar|RNAhybrid
NR3C2	P08235		hsa-miR-210-3p	0.389689	13	Very High	BCmicrO|BiTargeting|CoMeTa|ElMMo3|MBStar|MirAncesTar|miRcode|mirCoX|miRDB|MirMAP|MirSNP|miRTar2GO|RNAhybrid
GEMIN8	Q9NWZ8		hsa-miR-210-3p	0.389461	12	Very High	BCmicrO|ElMMo3|microrna.org|MirAncesTar|mirCoX|miRDB|MirTar|Mirza-G|PITA|RepTar|RNAhybrid|TargetRank
BCL11A	Q9H165		hsa-miR-210-3p	0.389088	10	Very High	BCmicrO|BiTargeting|DIANA|MBStar|MirAncesTar|miRcode|mirCoX|miRTar2GO|MultiMiTar|RNAhybrid
FLNC	Q14315		hsa-miR-210-3p	0.388742	13	Very High	BCmicrO|BiTargeting|CoMeTa|ElMMo3|microrna.org|MirAncesTar|miRcode|mirCoX|miRDB|MirMAP|MirSNP|RepTar|RNAhybrid
KCNH5	Q8NCM2		hsa-miR-210-3p	0.388579	12	Very High	BCmicrO|BiTargeting|MBStar|MAMI|MirAncesTar|mirbase|mirCoX|MirMAP|miRTar2GO|MultiMiTar|RepTar|RNAhybrid
NFAT5	O94916		hsa-miR-210-3p	0.387026	13	Very High	BCmicrO|CoMeTa|ElMMo3|MBStar|MirAncesTar|miRcode|mirCoX|miRDB|MirMAP|Mirza-G|MultiMiTar|PITA|RNAhybrid
PTPRK	Q15262		hsa-miR-210-3p	0.38646	10	Very High	BCmicrO|CoMeTa|MBStar|MirAncesTar|miRcode|mirCoX|miRTar2GO|MultiMiTar|RepTar|RNAhybrid
NFIC	P08651		hsa-miR-210-3p	0.386117	13	Very High	BCmicrO|BiTargeting|DIANA|ElMMo3|MBStar|microrna.org|MirAncesTar|miRcode|mirCoX|miRDB|MirMAP|miRTar2GO|RNAhybrid
YAF2	Q8IY57		hsa-miR-210-3p	0.385301	15	Very High	BCmicrO|BiTargeting|CoMeTa|ElMMo3|MBStar|microrna.org|MirAncesTar|miRcode|mirCoX|miRDB|MirMAP|Mirza-G|MultiMiTar|RepTar|RNAhybrid
SAMD12	Q8N8I0		hsa-miR-210-3p	0.384755	14	Very High	BCmicrO|DIANA|ElMMo3|MBStar|MirAncesTar|miRcode|mirCoX|miRDB|MirMAP|miRTar2GO|Mirza-G|PITA|RepTar|RNAhybrid
SMIM12	Q96EX1		hsa-miR-210-3p	0.384592	15	Very High	BCmicrO|BiTargeting|ElMMo3|MBStar|microrna.org|MirAncesTar|miRcode|mirCoX|miRDB|MirMAP|MirSNP|Mirza-G|RepTar|RNA22|RNAhybrid
TMEM40	Q8WWA1		hsa-miR-210-3p	0.384511	15	Very High	BCmicrO|BiTargeting|CoMeTa|ElMMo3|microrna.org|MirAncesTar|mirbase|miRcode|mirCoX|miRDB|MirMAP|Mirza-G|PITA|RepTar|RNAhybrid
ADAMTS5	Q9UNA0		hsa-miR-210-3p	0.384499	12	Very High	BCmicrO|ElMMo3|MirAncesTar|miRcode|mirCoX|miRDB|MirMAP|MirSNP|miRTar2GO|Mirza-G|MultiMiTar|RepTar
PRPF38B	Q5VTL8		hsa-miR-210-3p	0.3838	16	Very High	BCmicrO|BiTargeting|DIANA|ElMMo3|MBStar|MirAncesTar|mirbase|miRcode|mirCoX|miRDB|MirMAP|miRTar2GO|Mirza-G|MultiMiTar|RNA22|RNAhybrid
SEL1L	Q9UBV2		hsa-miR-210-3p	0.383795	9	Very High	BCmicrO|BiTargeting|CoMeTa|MirAncesTar|mirCoX|miRTar2GO|MultiMiTar|RepTar|RNAhybrid
MEX3B	Q6ZN04		hsa-miR-210-3p	0.383491	9	Very High	BCmicrO|BiTargeting|MirAncesTar|miRcode|mirCoX|MirMAP|miRTar2GO|RNAhybrid|TargetScan
MRM2	Q9UI43		hsa-miR-210-3p	0.383189	15	Very High	BCmicrO|BiTargeting|ElMMo3|MAMI|microrna.org|MirAncesTar|mirbase|miRcode|mirCoX|miRDB|MirMAP|MirSNP|Mirza-G|RepTar|RNAhybrid
CLDN1	O95832		hsa-miR-210-3p	0.382825	11	Very High	BCmicrO|CoMeTa|ElMMo3|microrna.org|MirAncesTar|miRcode|mirCoX|miRDB|MirMAP|miRTar2GO|Mirza-G
C11orf58	O00193		hsa-miR-210-3p	0.382516	10	Very High	BCmicrO|BiTargeting|CoMeTa|MBStar|MirAncesTar|mirbase|mirCoX|miRTar2GO|MultiMiTar|RNAhybrid
MDGA1	Q8NFP4		hsa-miR-210-3p	0.382504	14	Very High	BCmicrO|BiTargeting|ElMMo3|MirAncesTar|miRcode|mirCoX|miRDB|MirMAP|MirSNP|Mirza-G|MultiMiTar|PITA|RepTar|RNAhybrid
